# Supplementary material
Source: Elsevier journal article supplement (https://comptes-rendus.academie-sciences.fr/chimie/article/10.1016/j.crci.2013.08.003/file/attach/mmc1.pdf)
Supplement: mmc1 [file mmc1.pdf]

14-(phenyl)14H-dibenzo[a,j]xanthene:

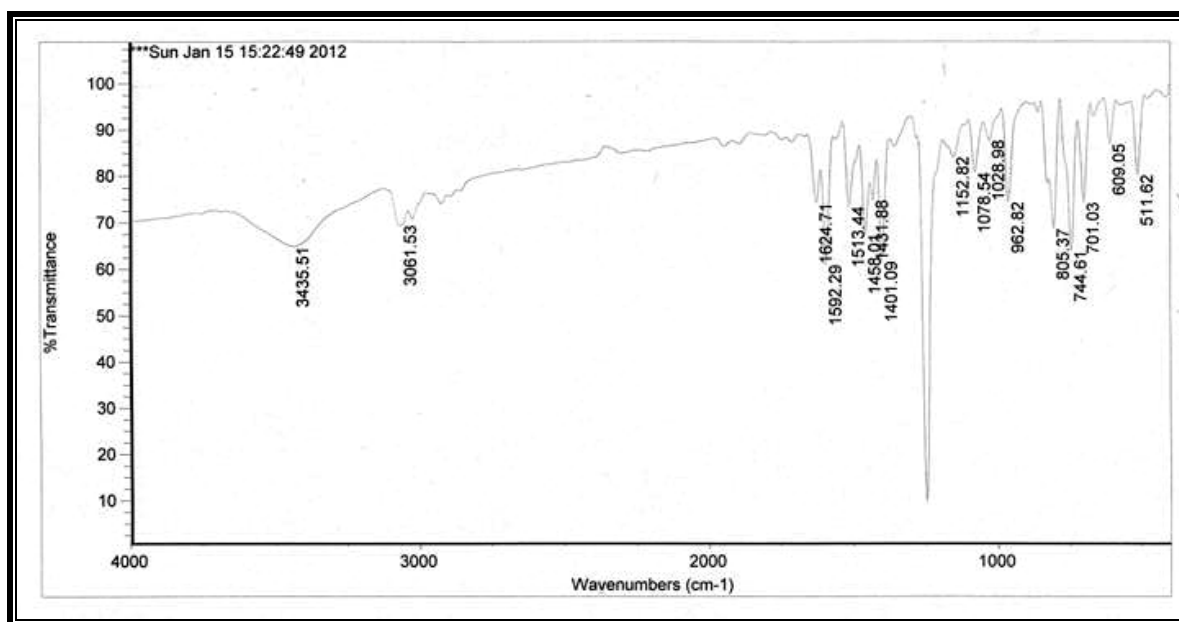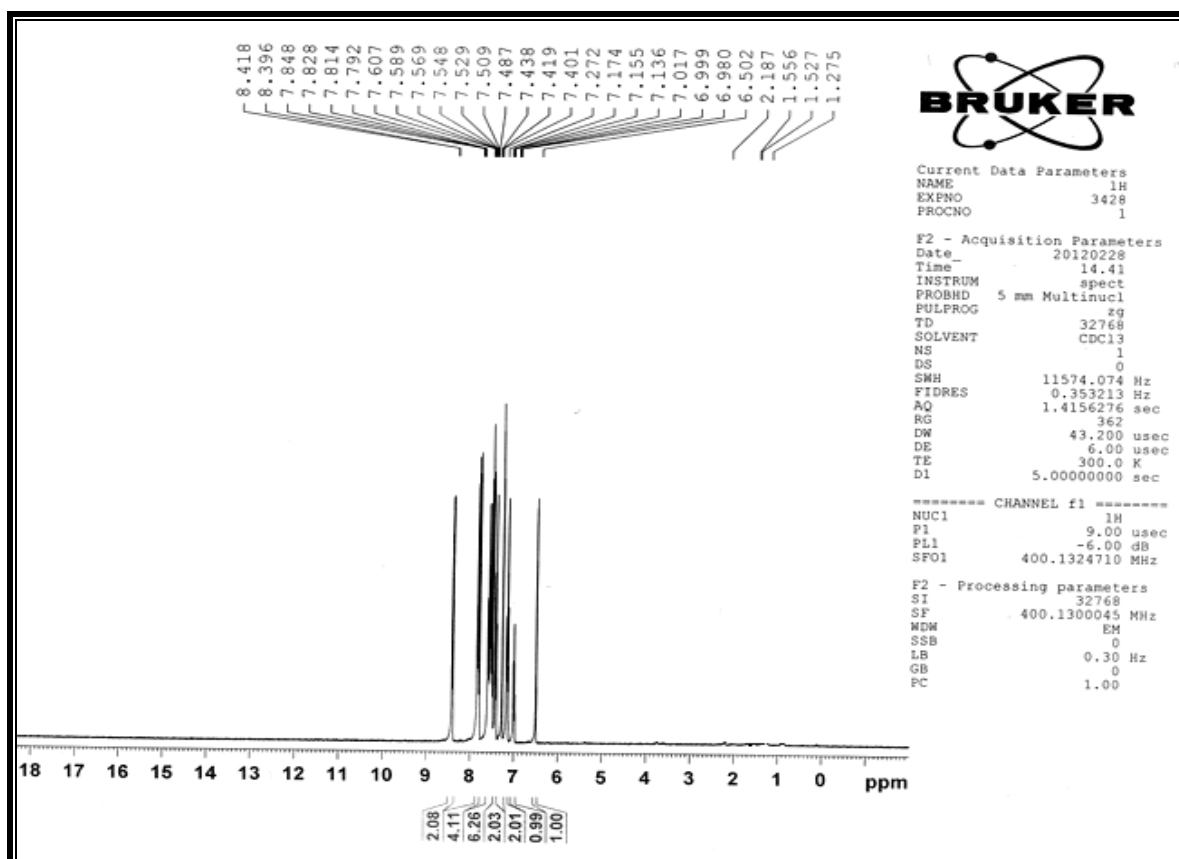

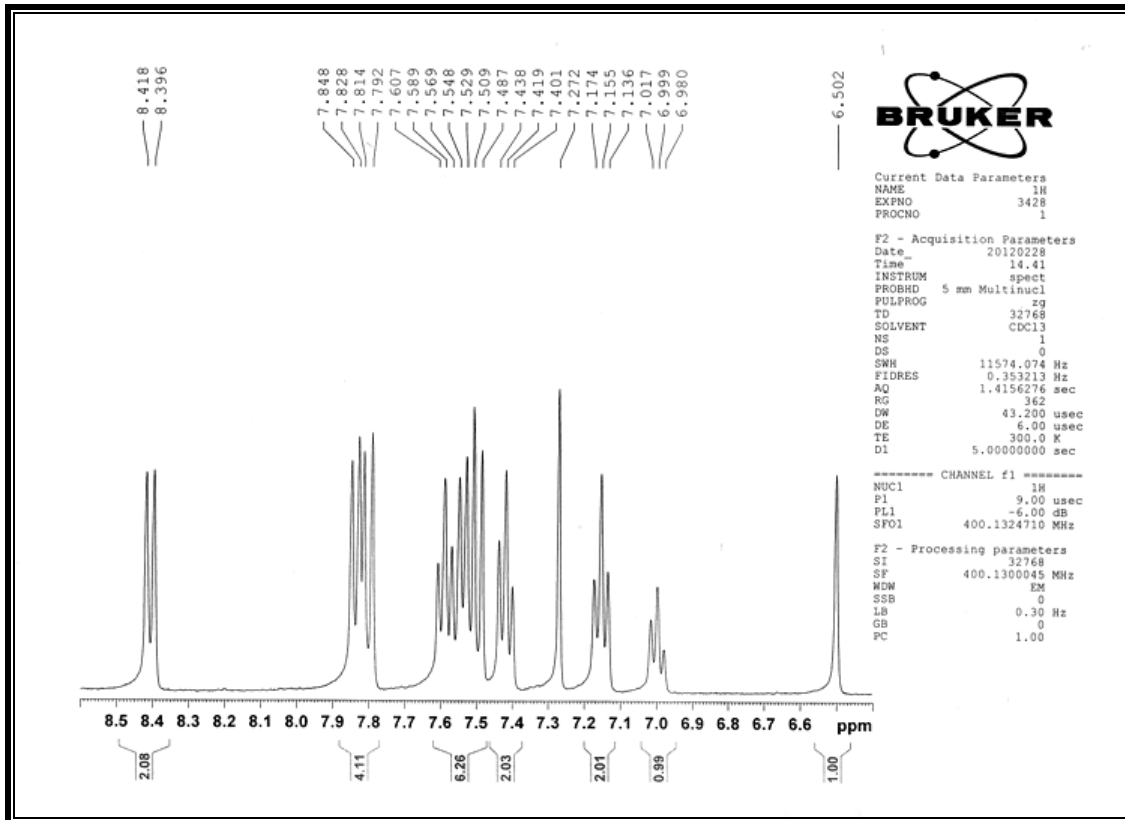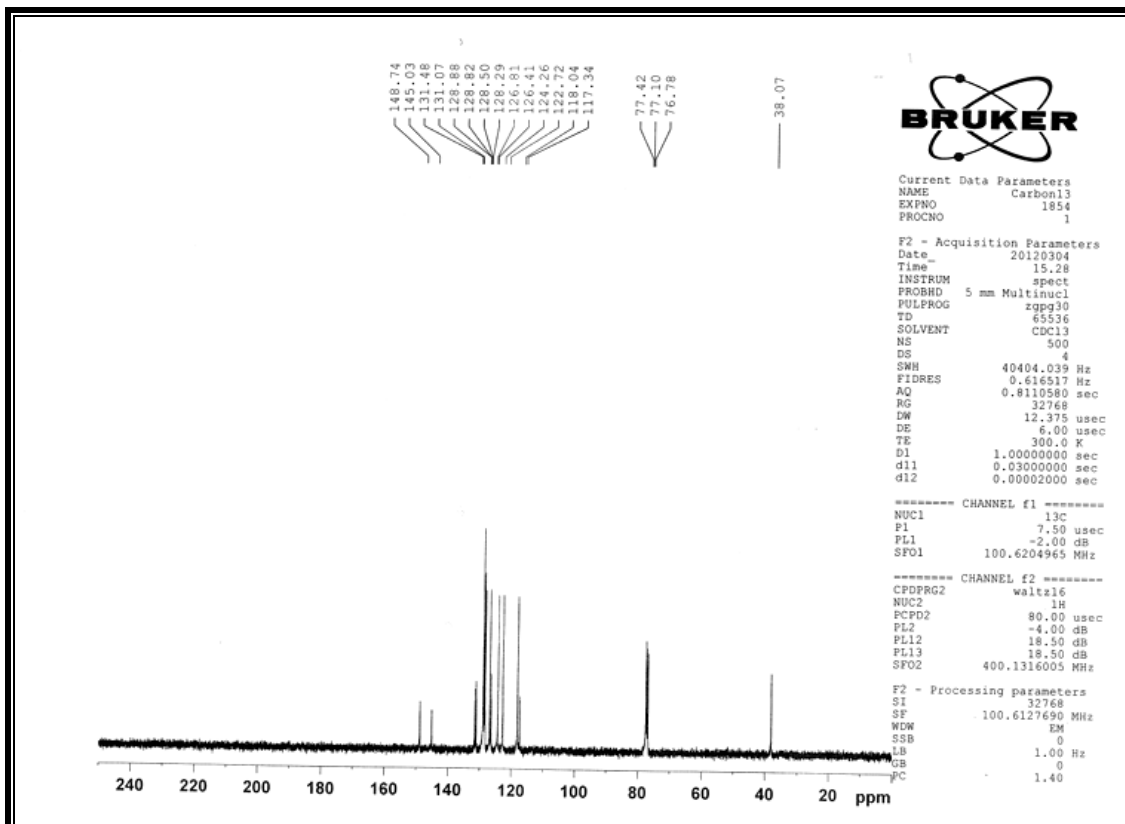

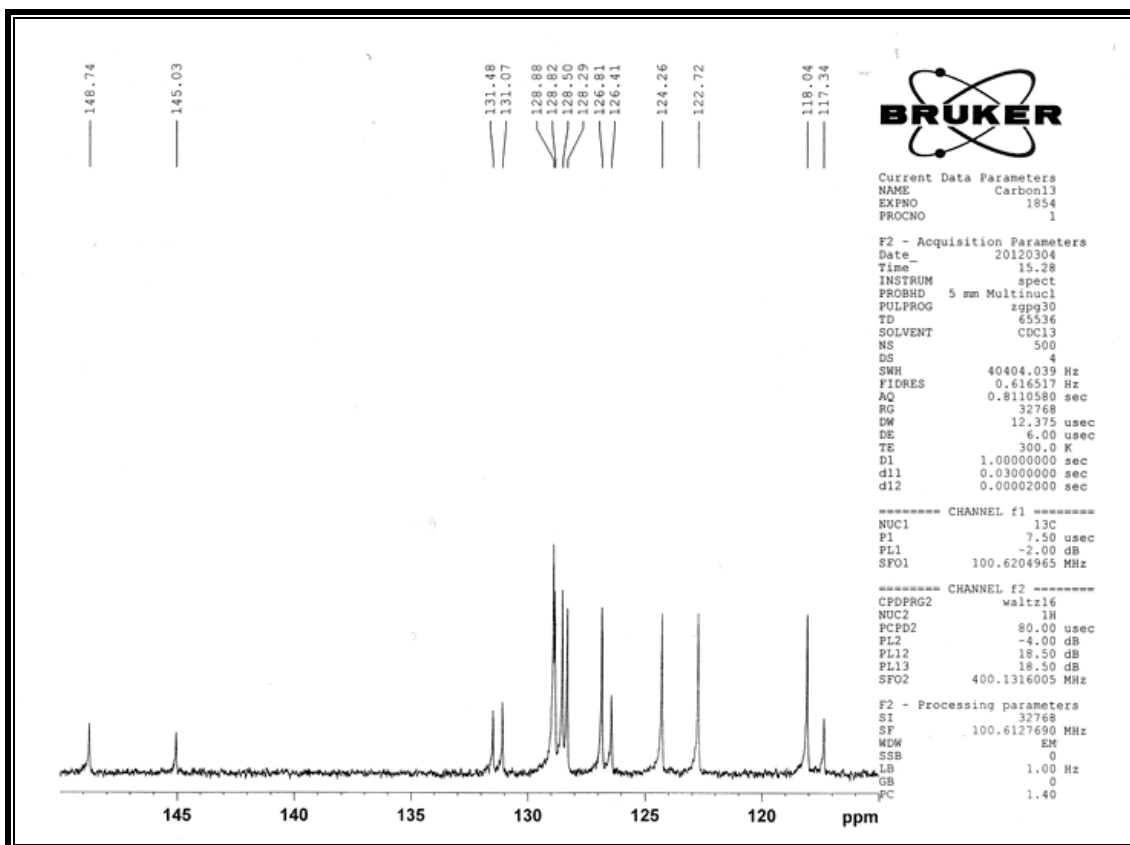

14-(2-nitrophenyl)-14H-dibenzo[a,j]xanthene:

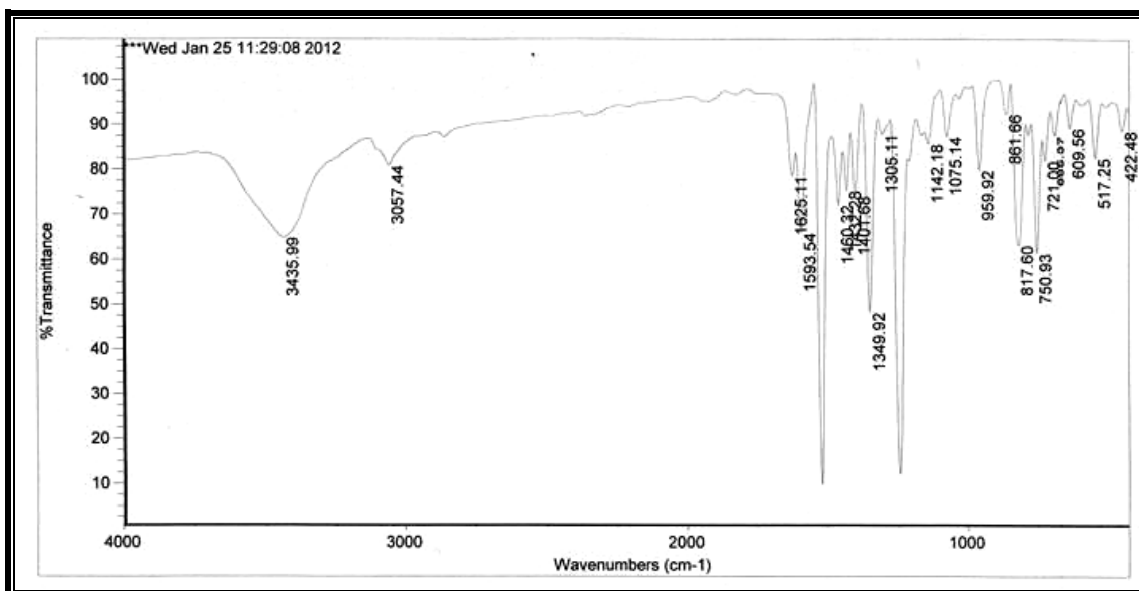

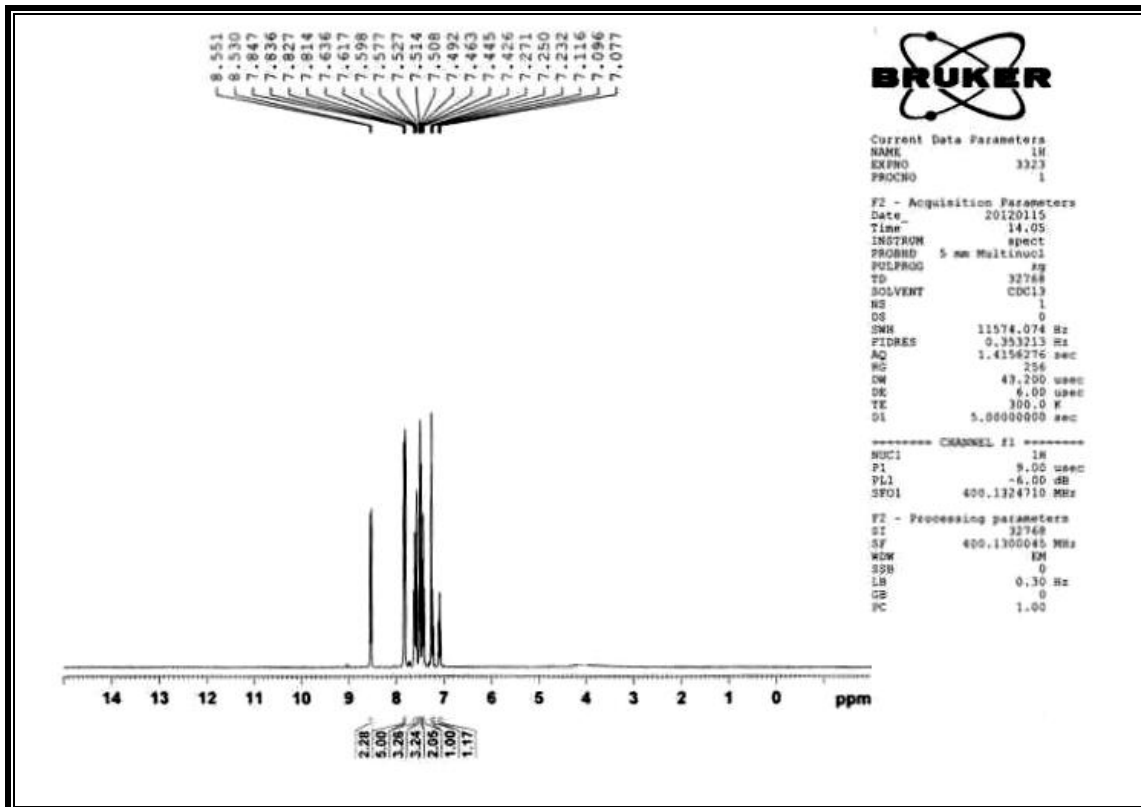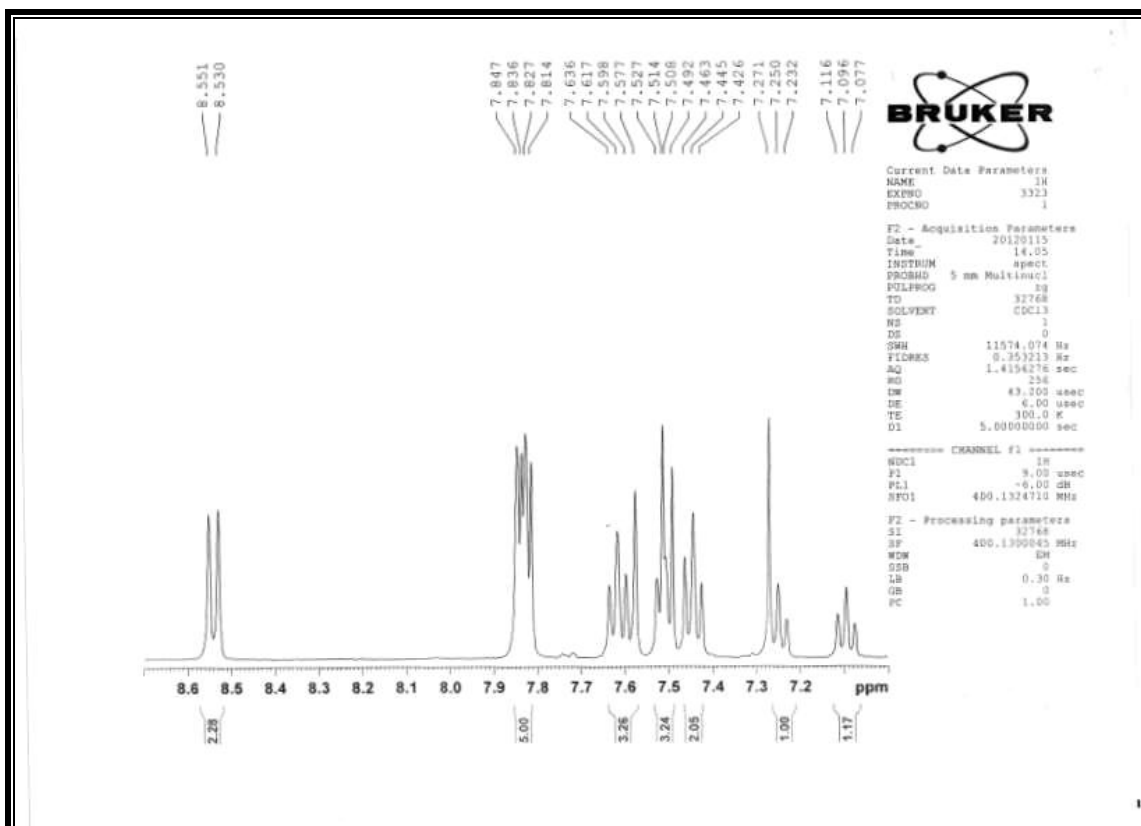

14-(3-nitrophenyl)14H-dibenzo[a,j]xanthene:

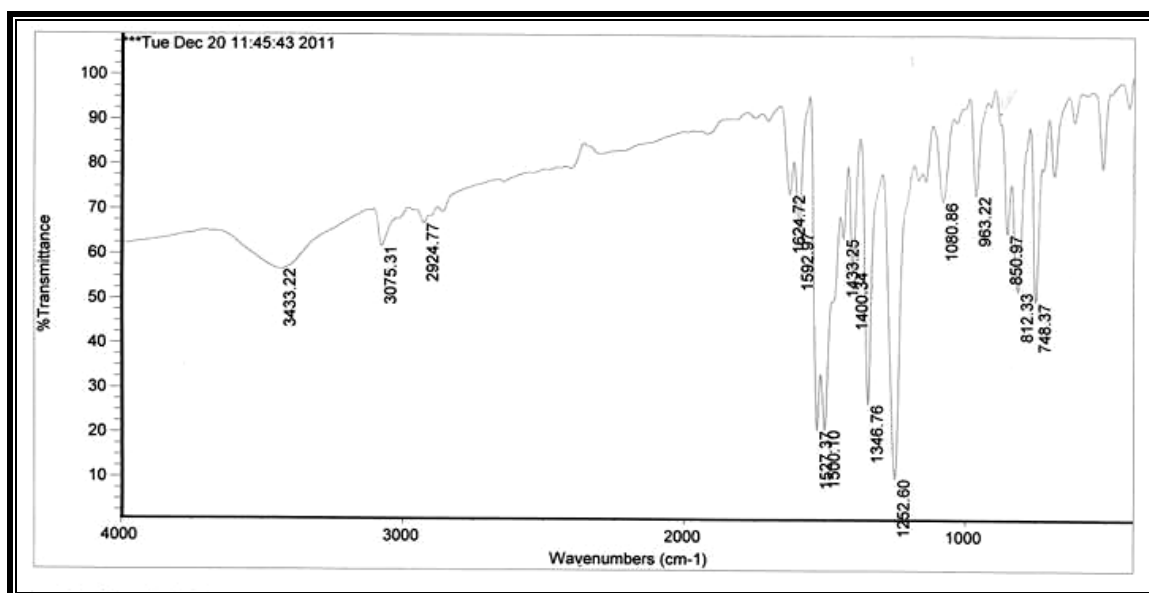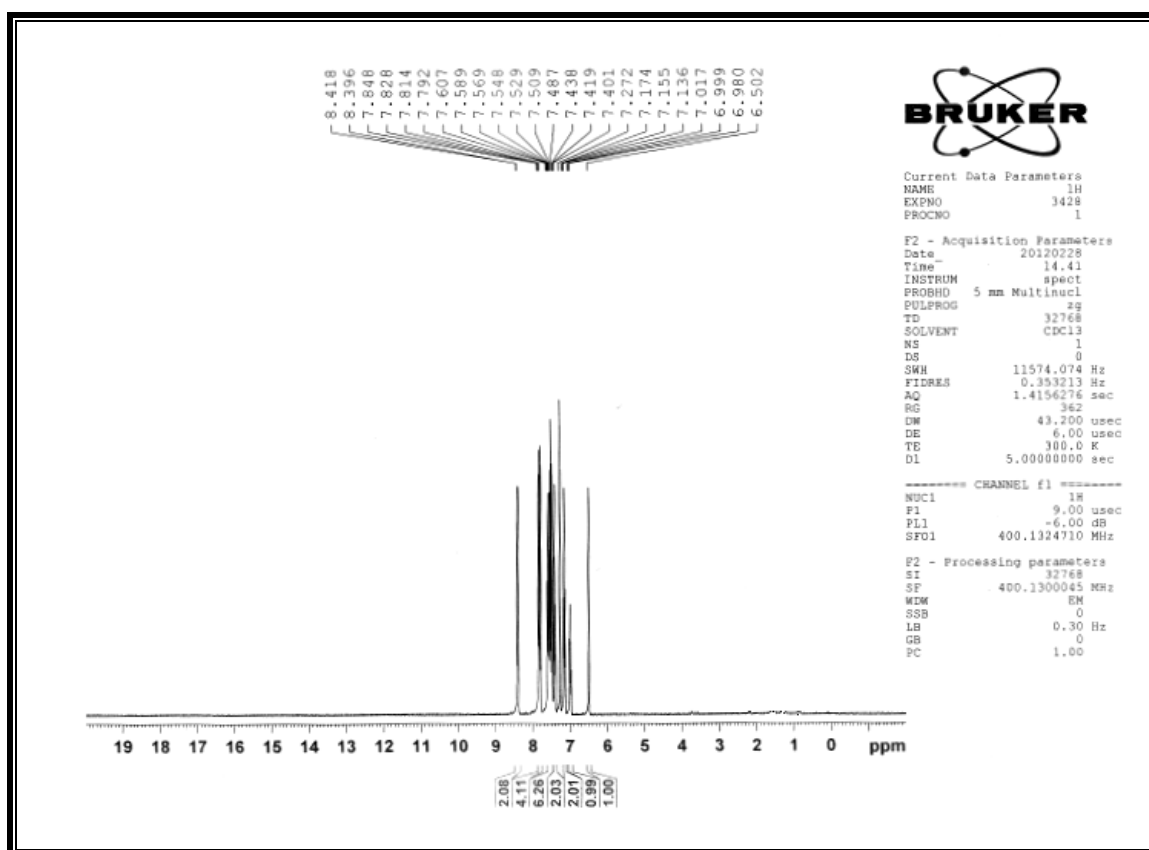

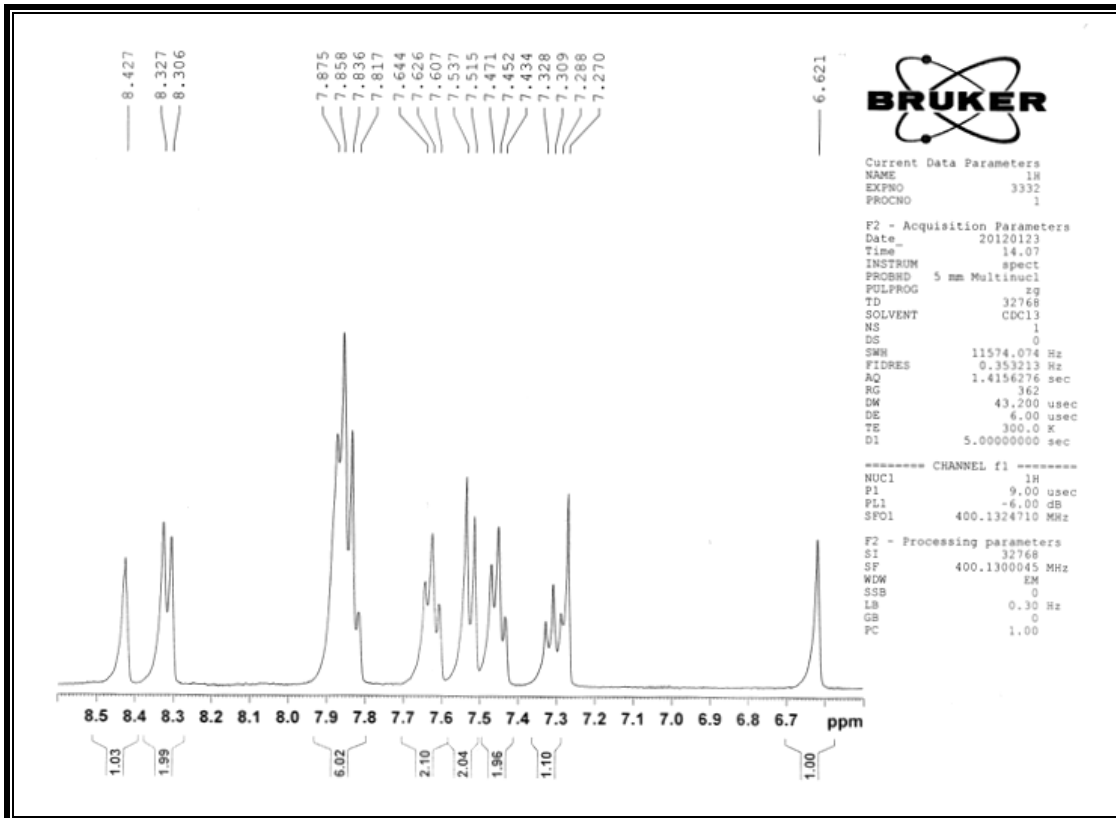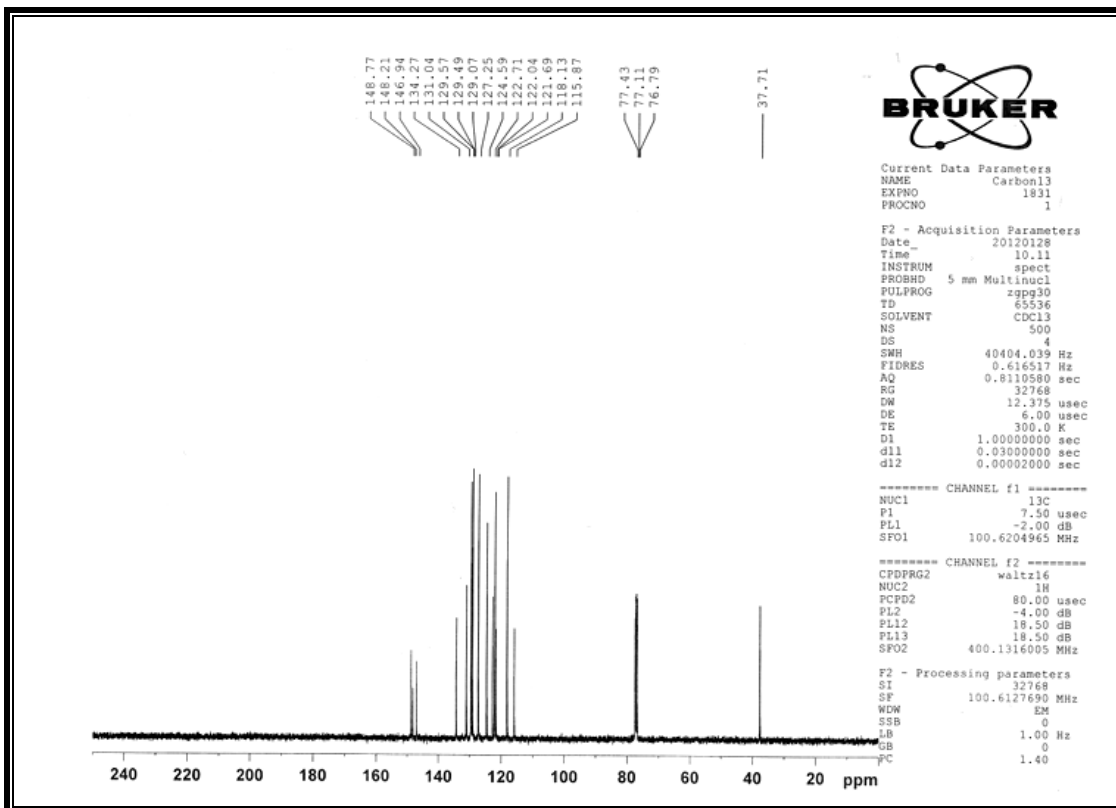

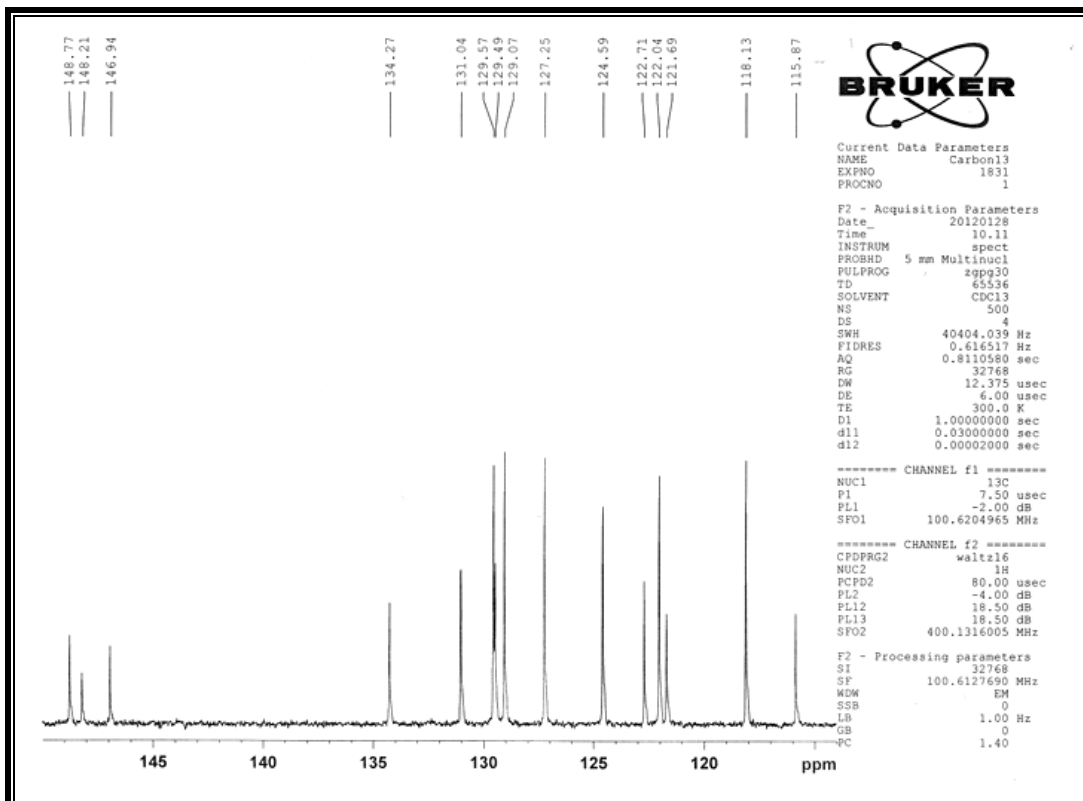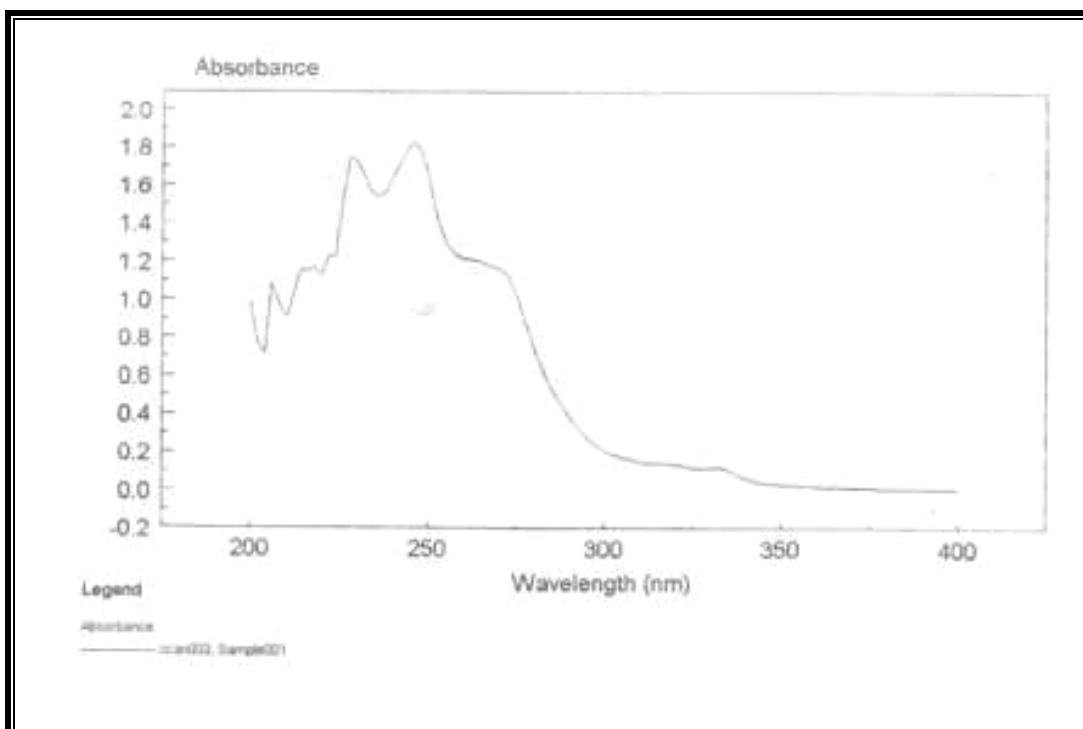

14-(4-nitrophenyl)14H-dibenzo[a,j]xanthene:

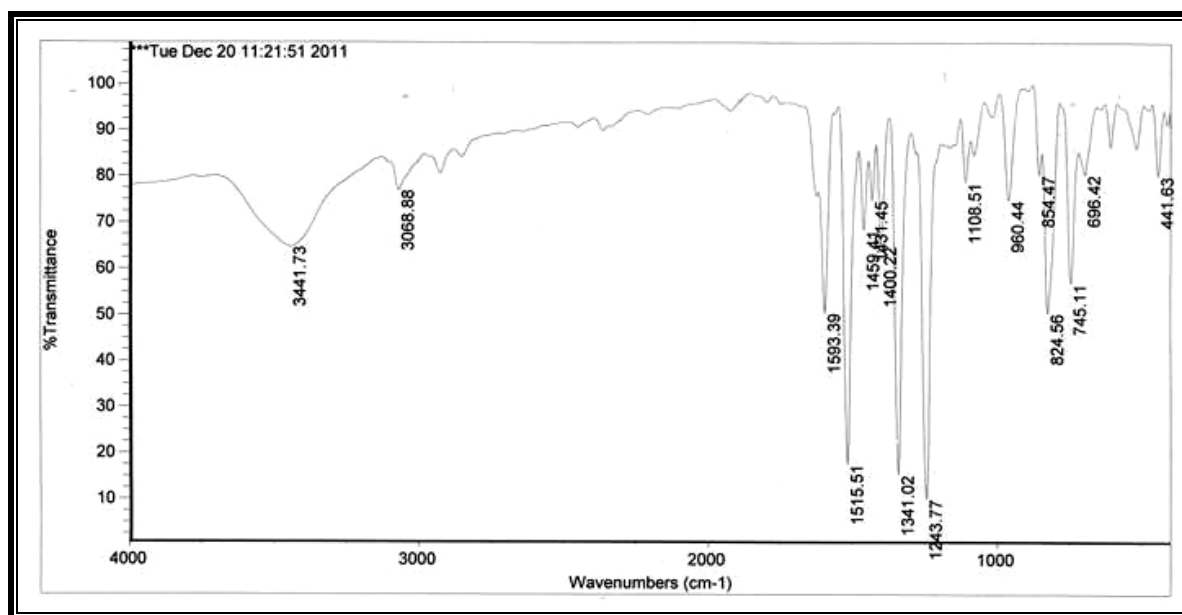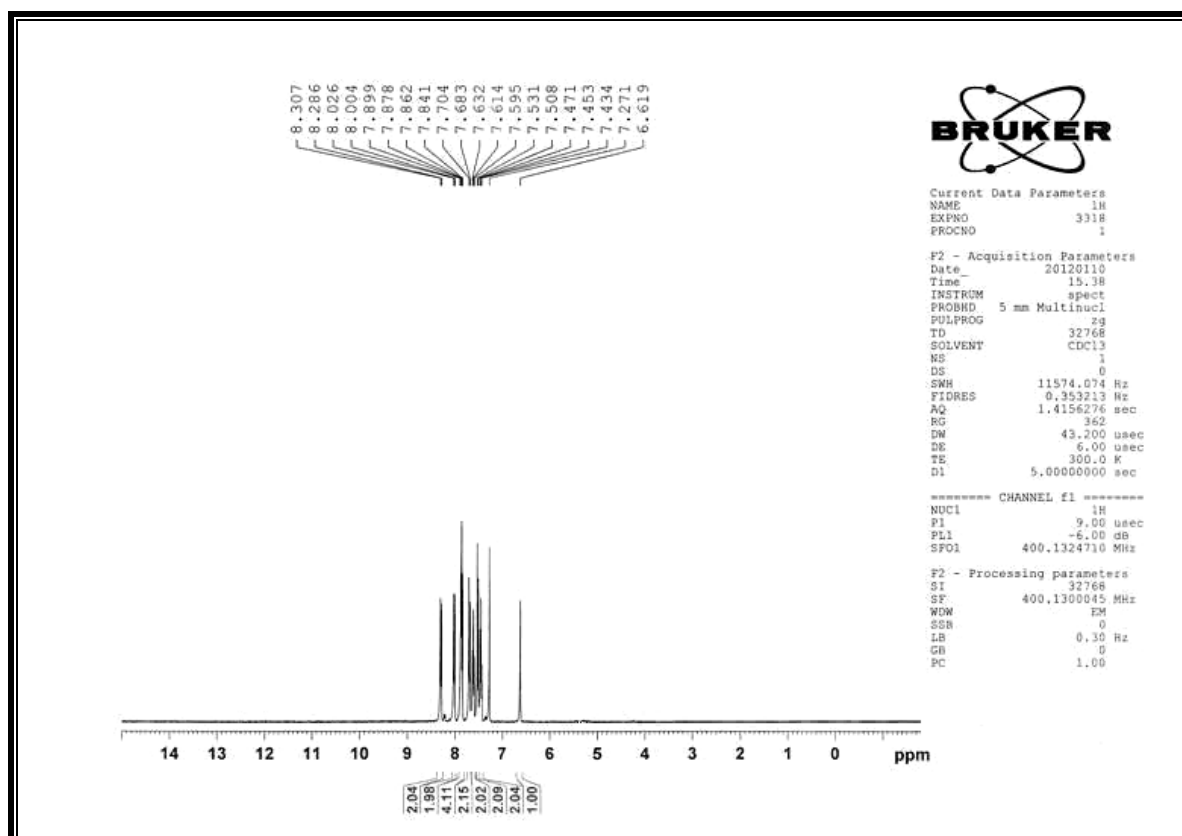



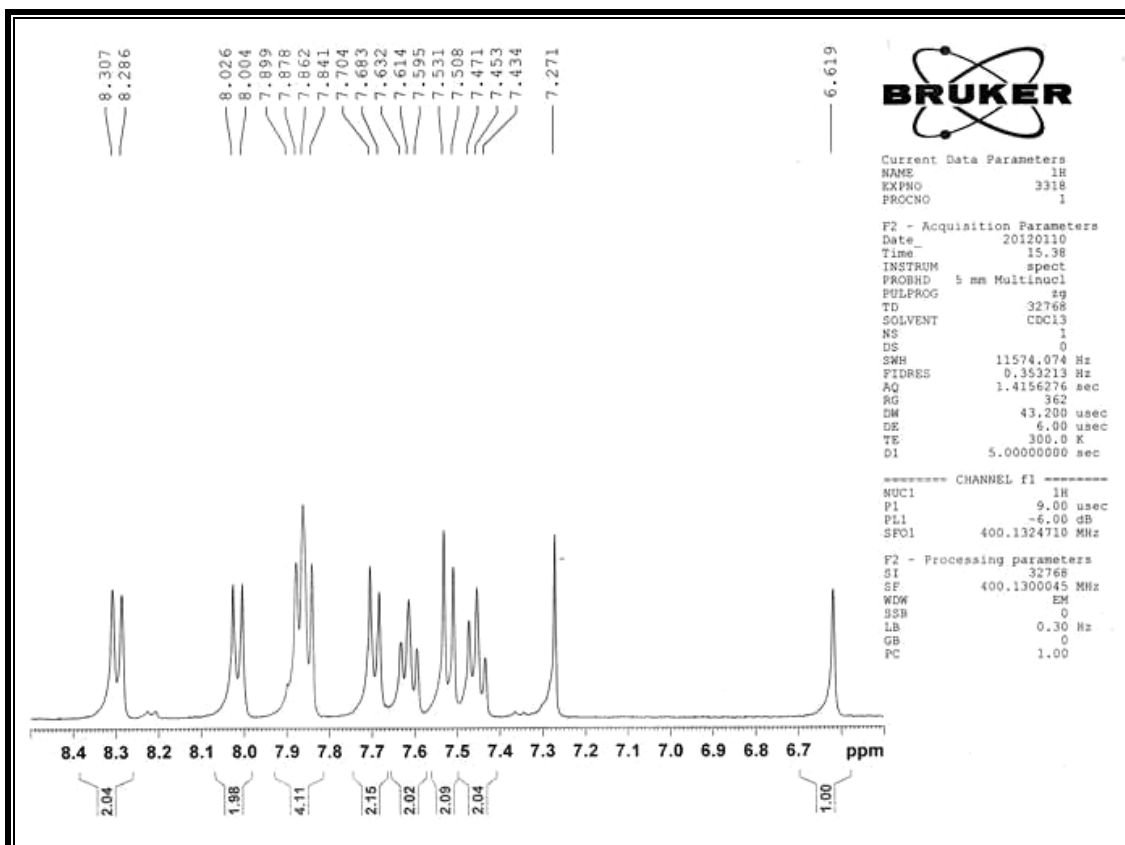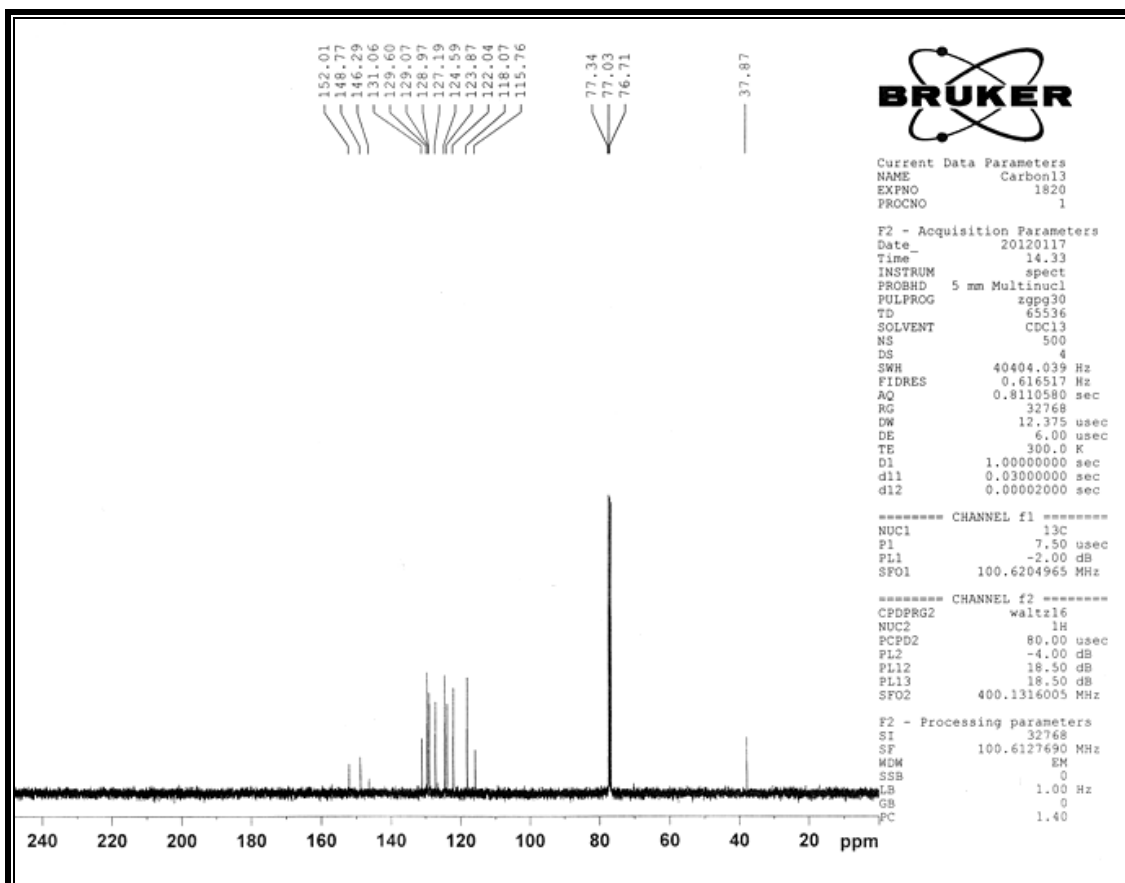

14-(2-chlorophenyl)14H-dibenzo[a,j]xanthene:

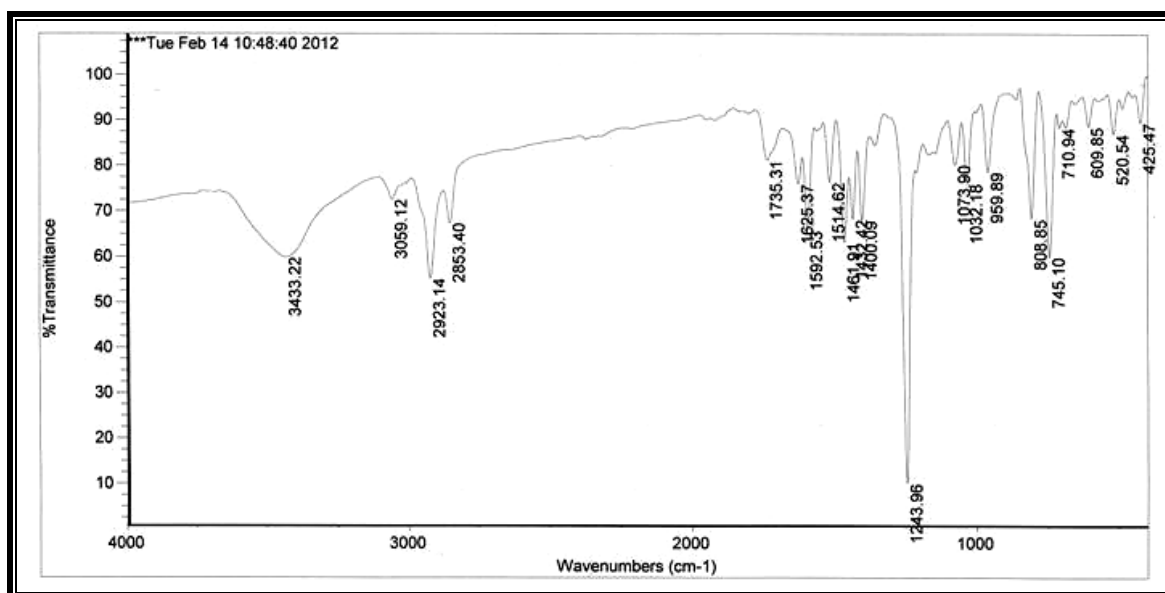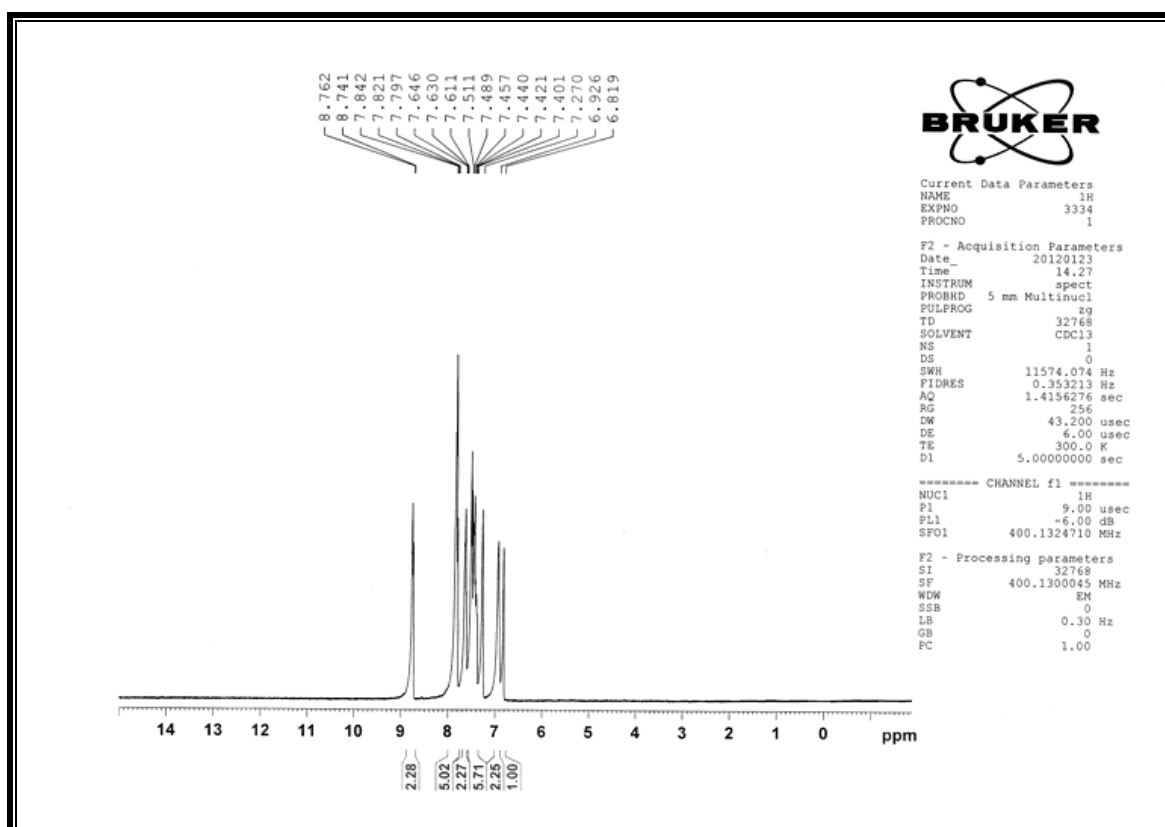

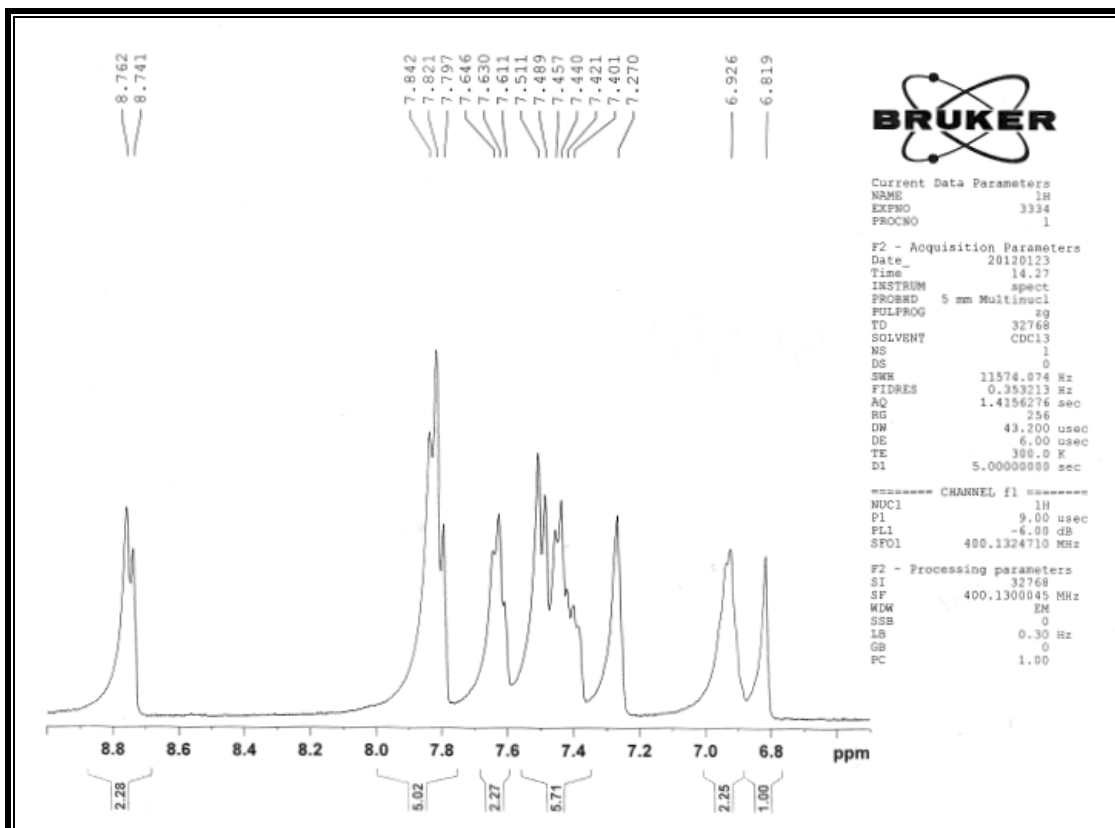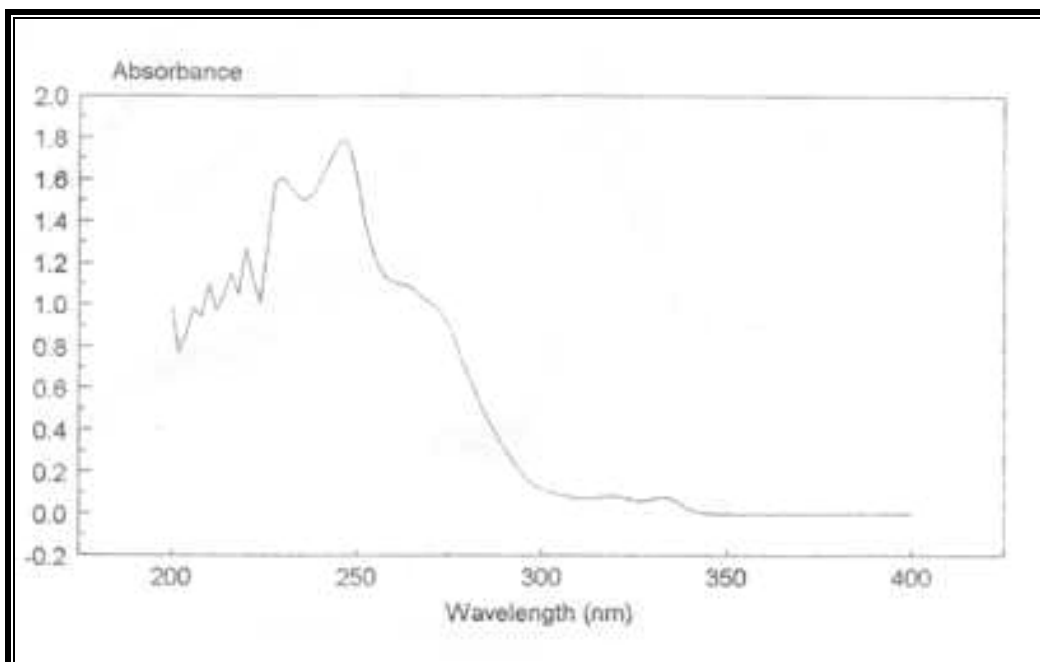

14-(4-chlorophenyl)14H-dibenzo[a,j]xanthene:

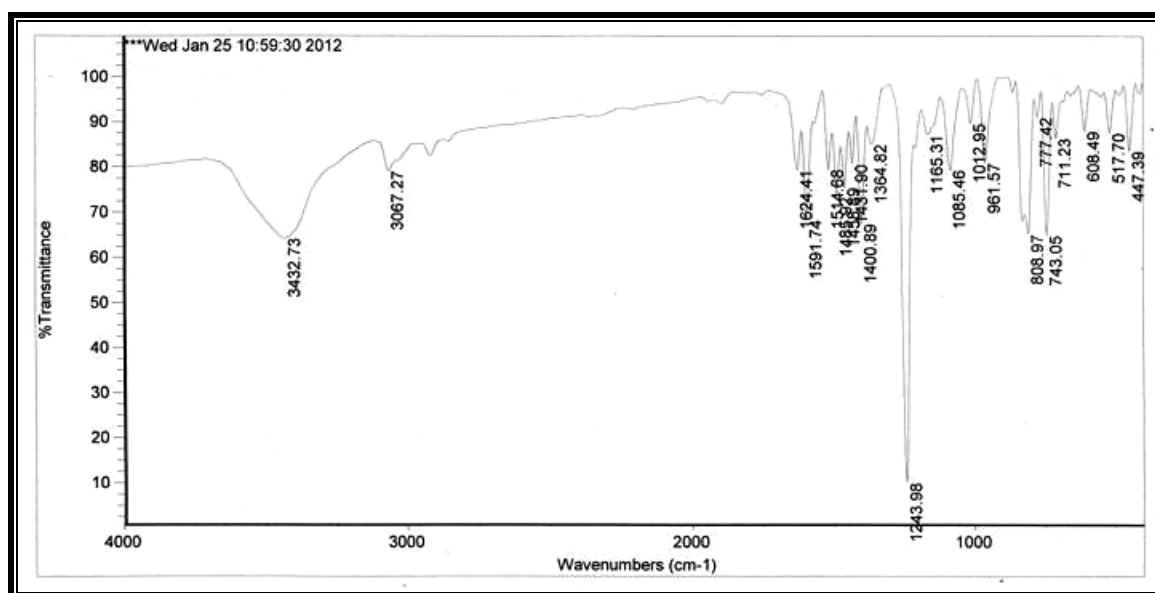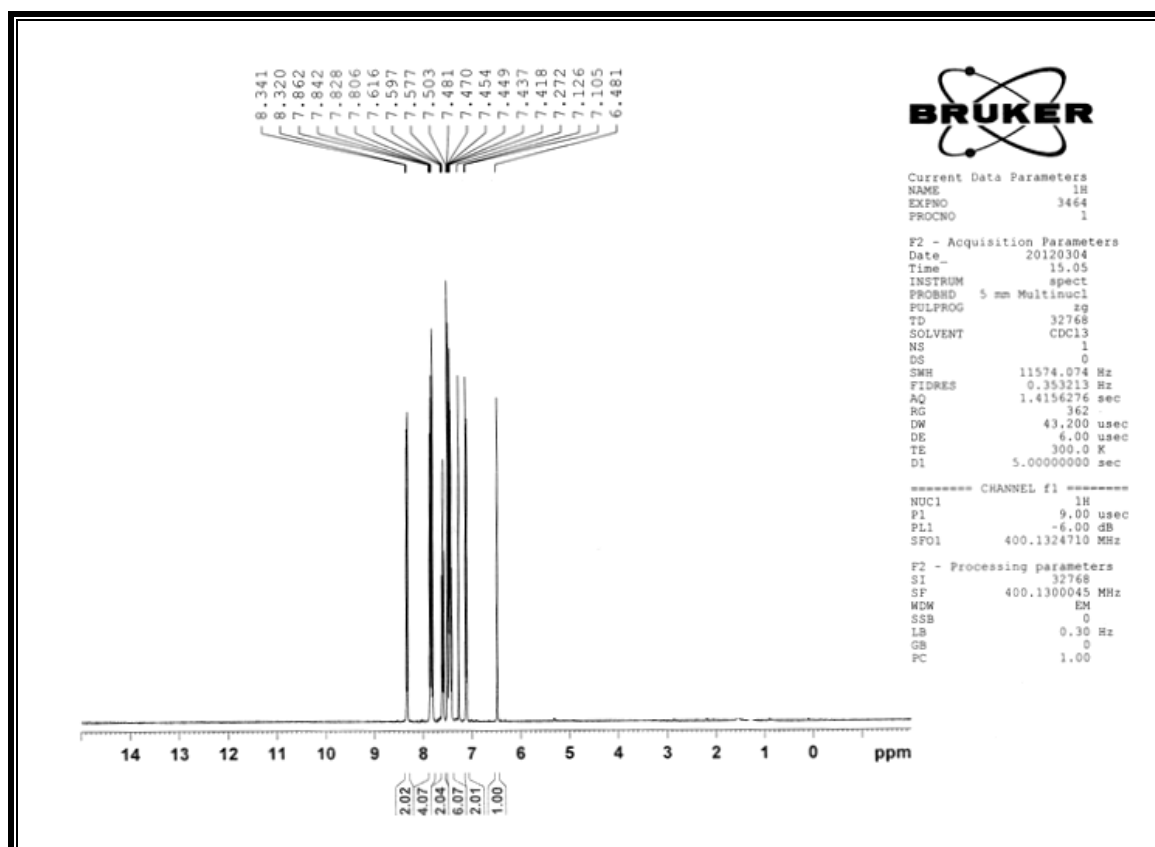

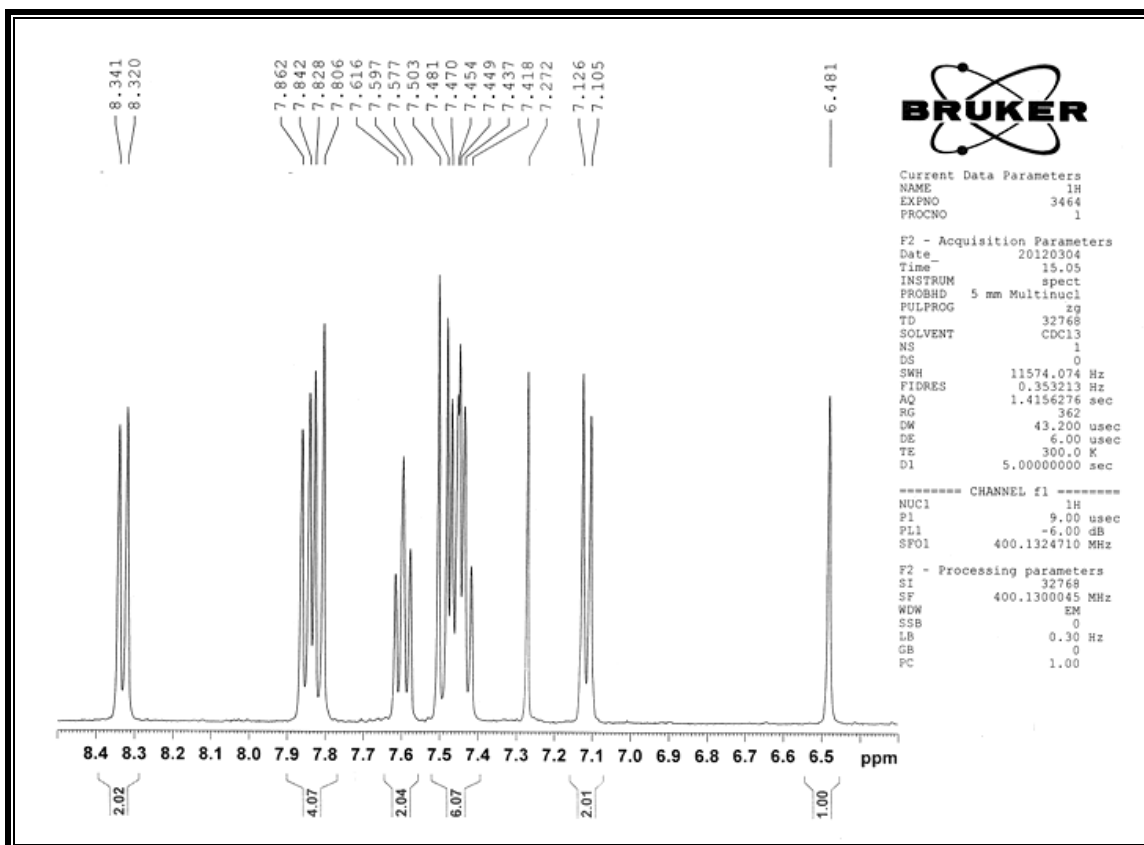

14-(2,3-dichlorophenyl)-14H-dibenzo[a,j]xanthene:

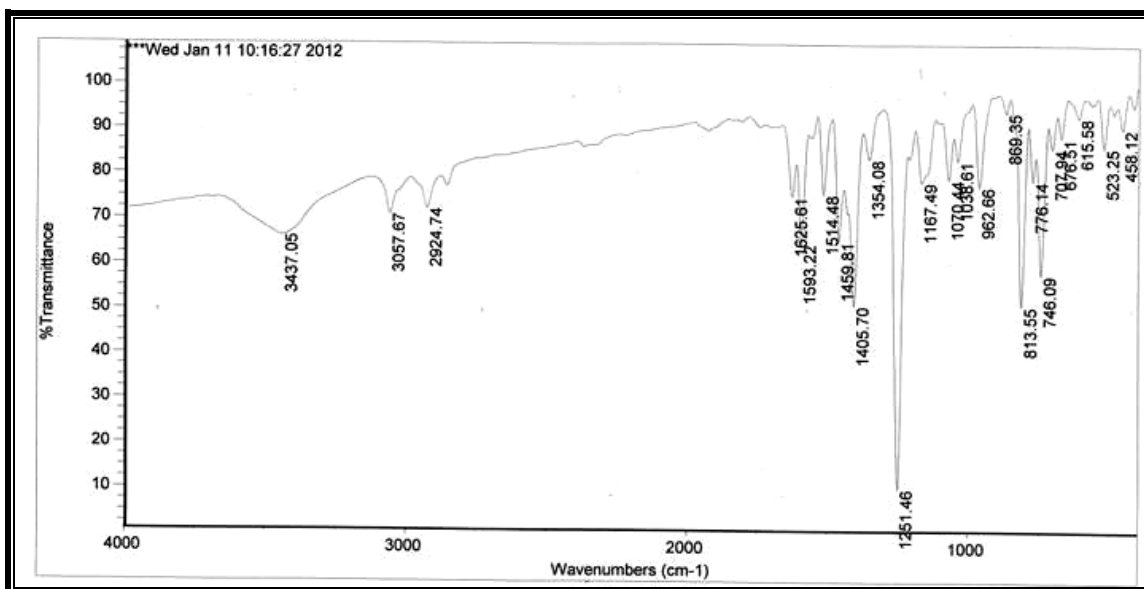

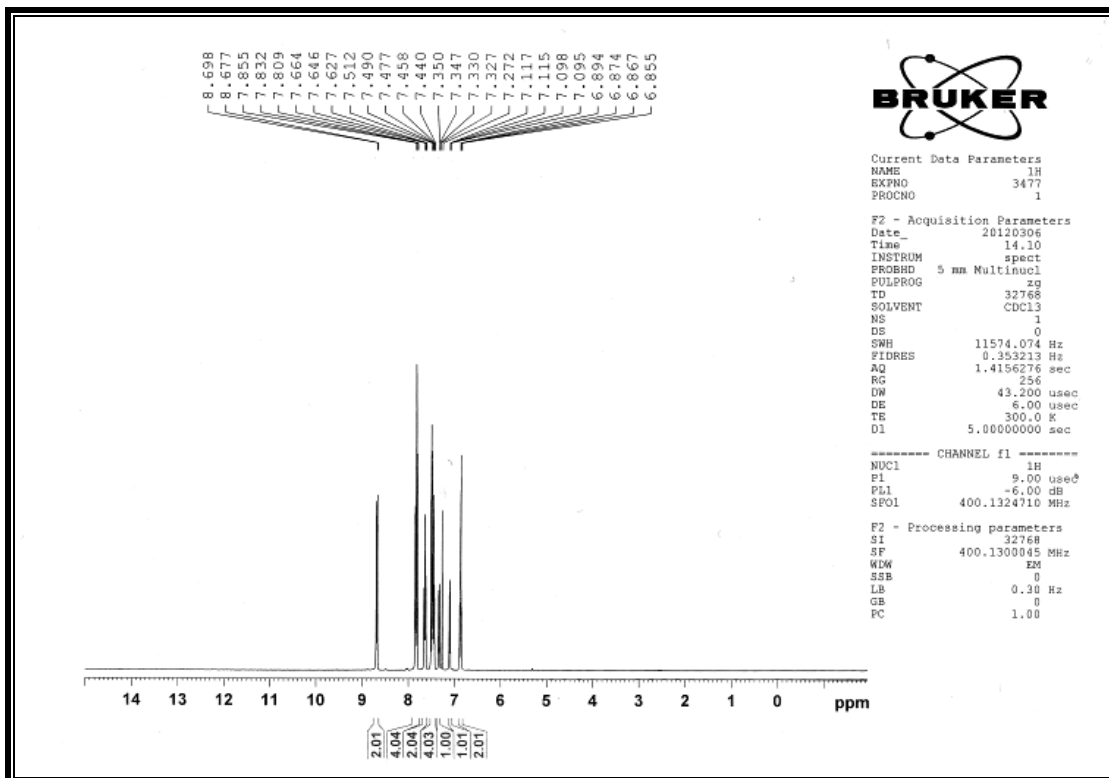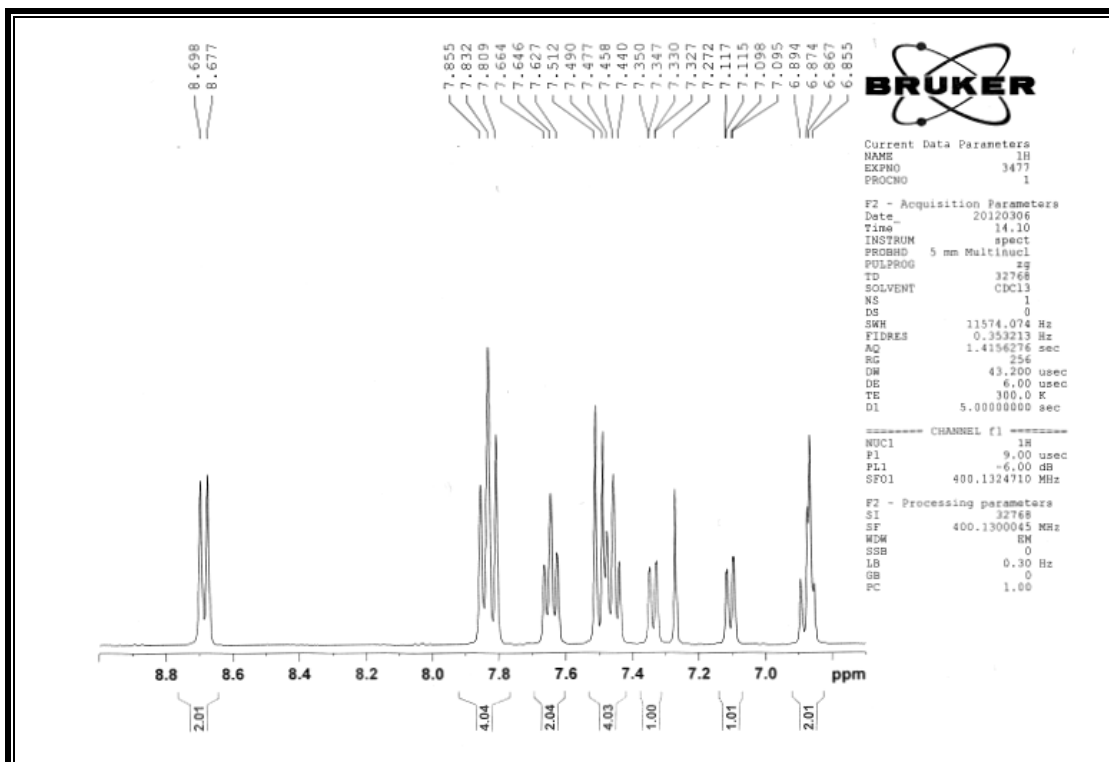

14-(4-chloro-3-nitrophenyl)14H-dibenzo[a,j]xanthene:

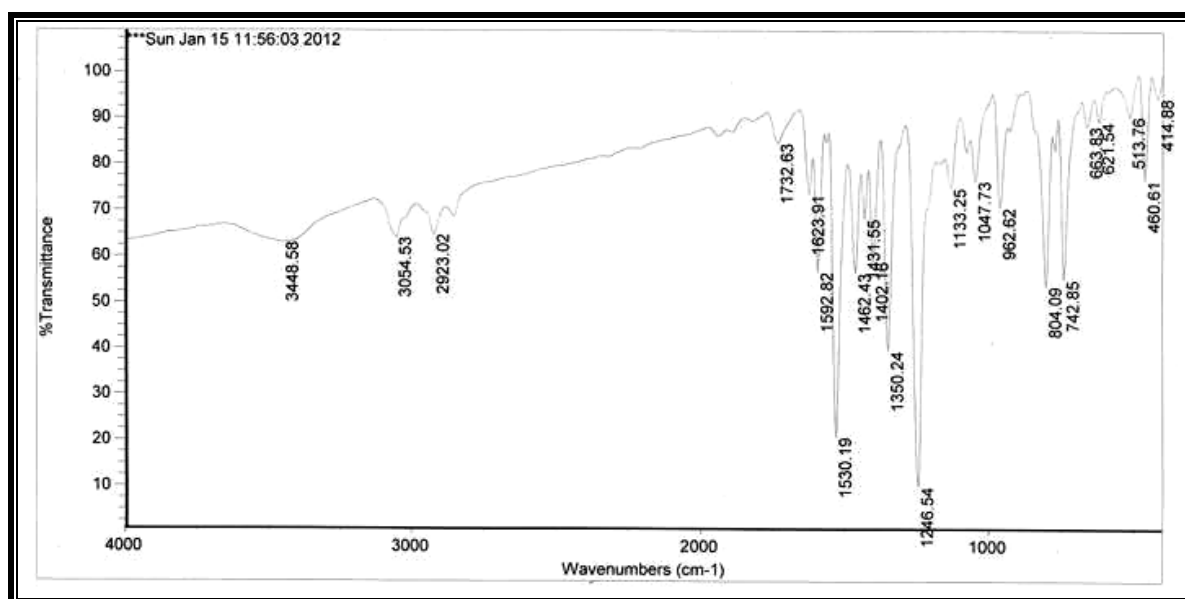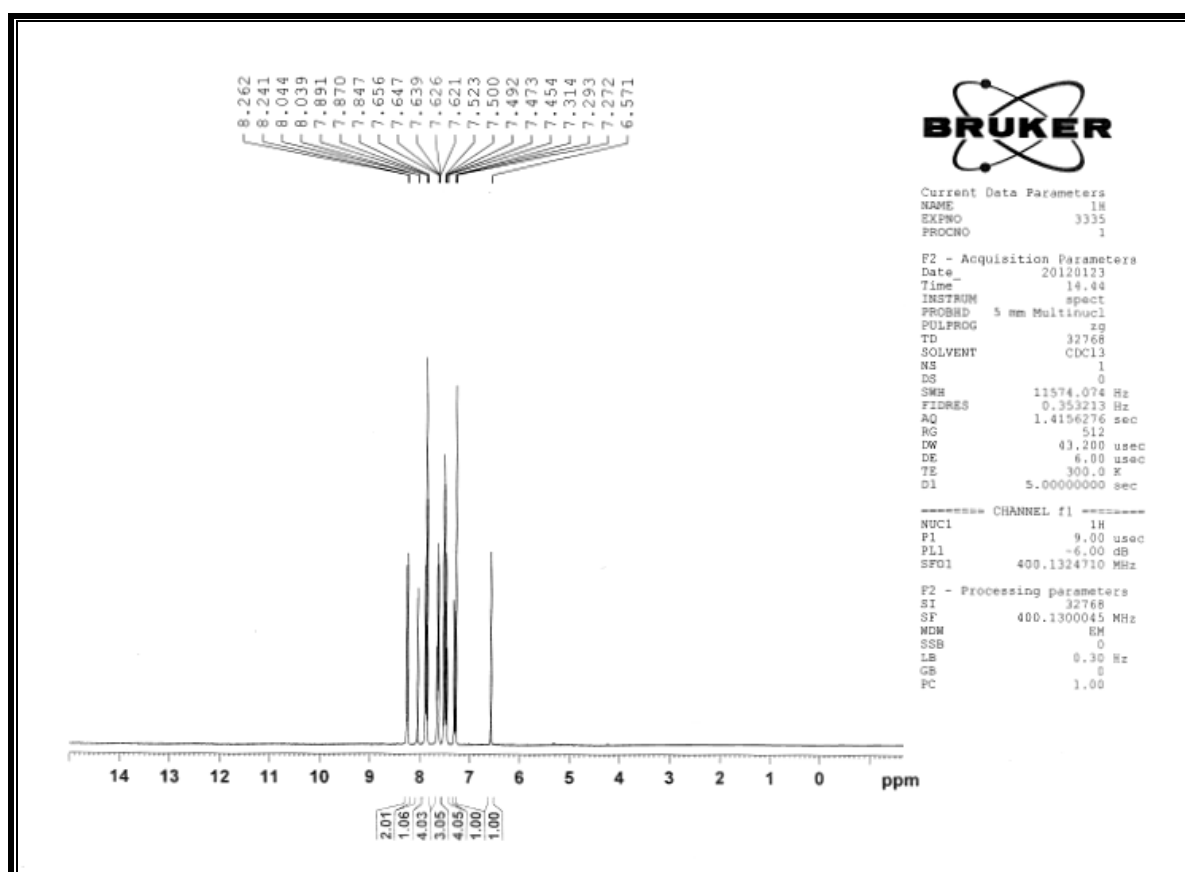

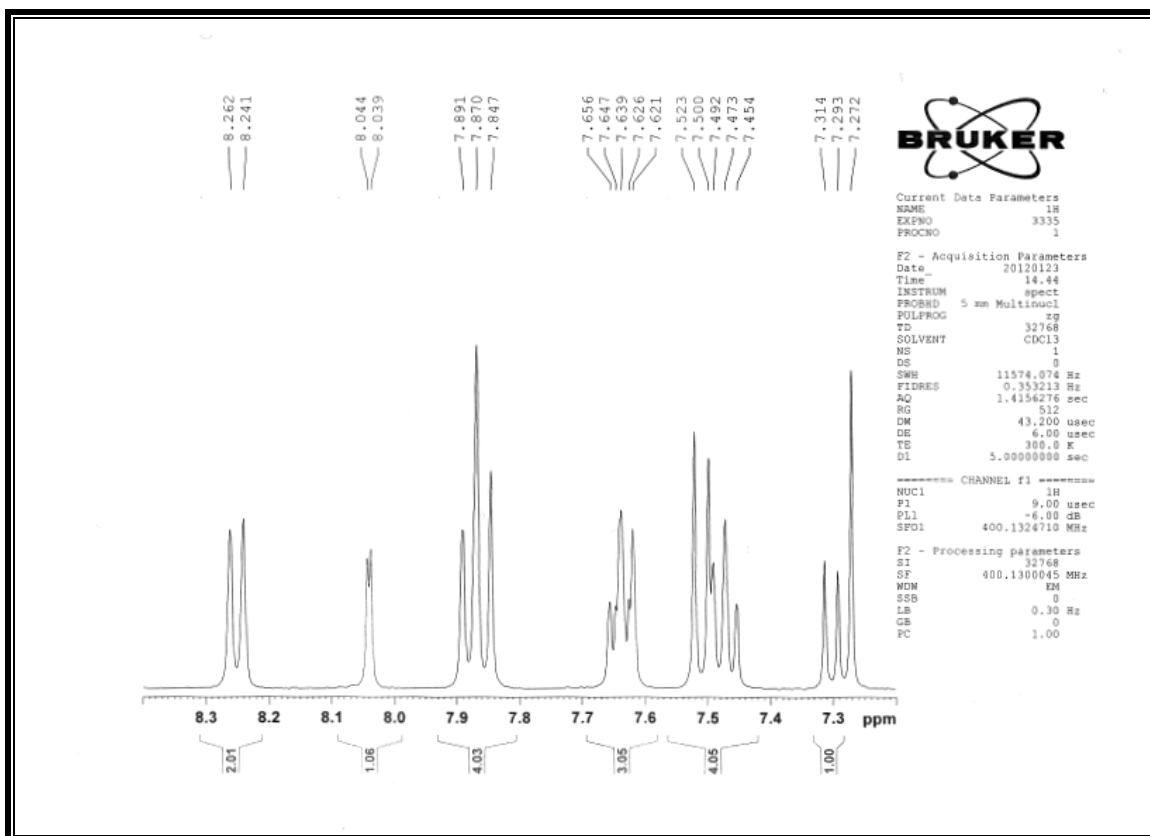

14-(4-methoxy)14H-dibenzo[a,j]xanthene:

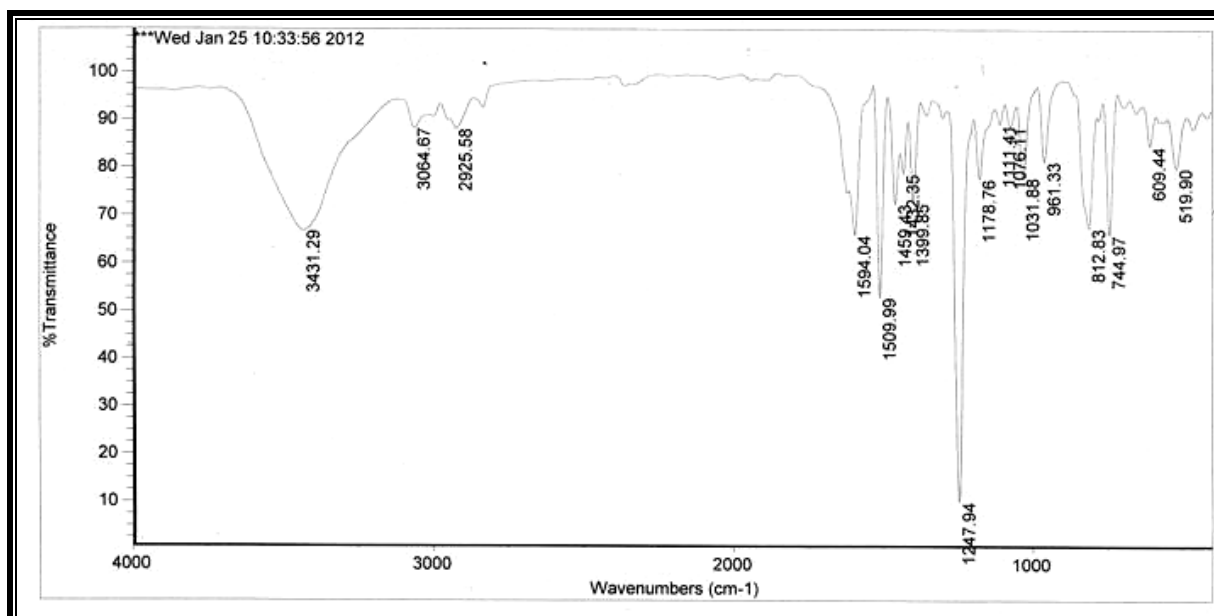



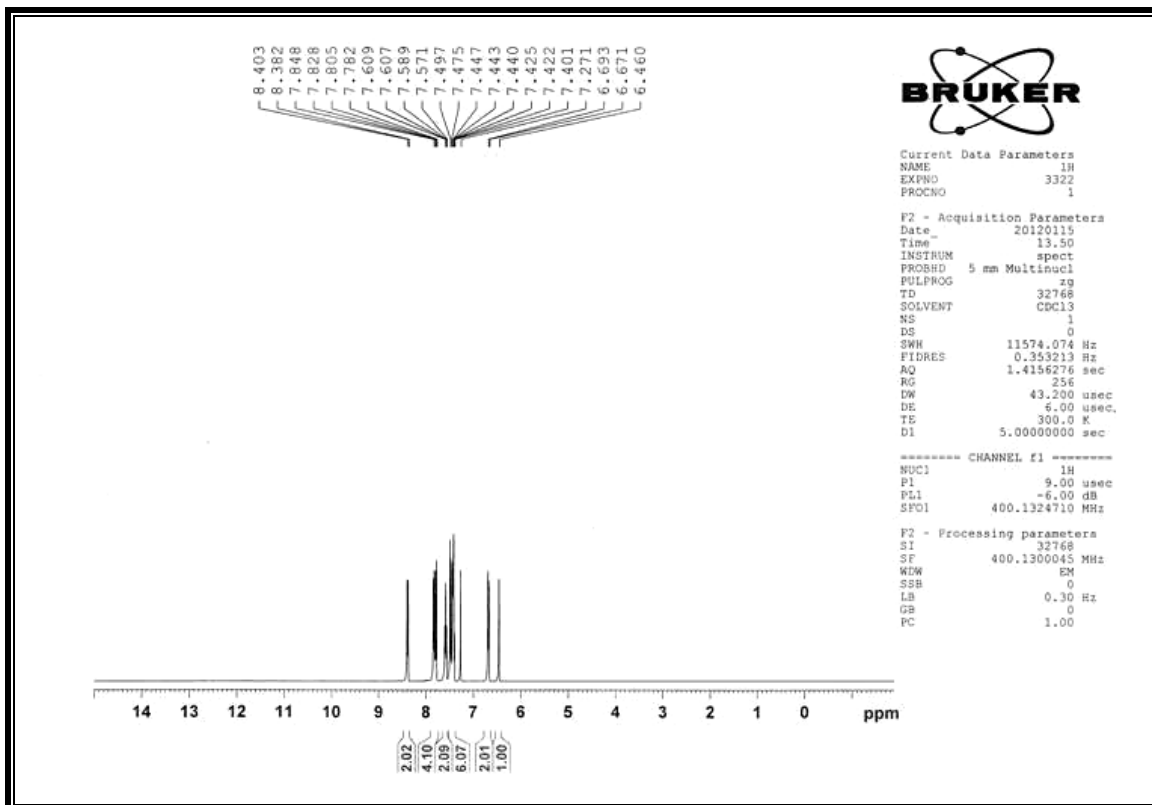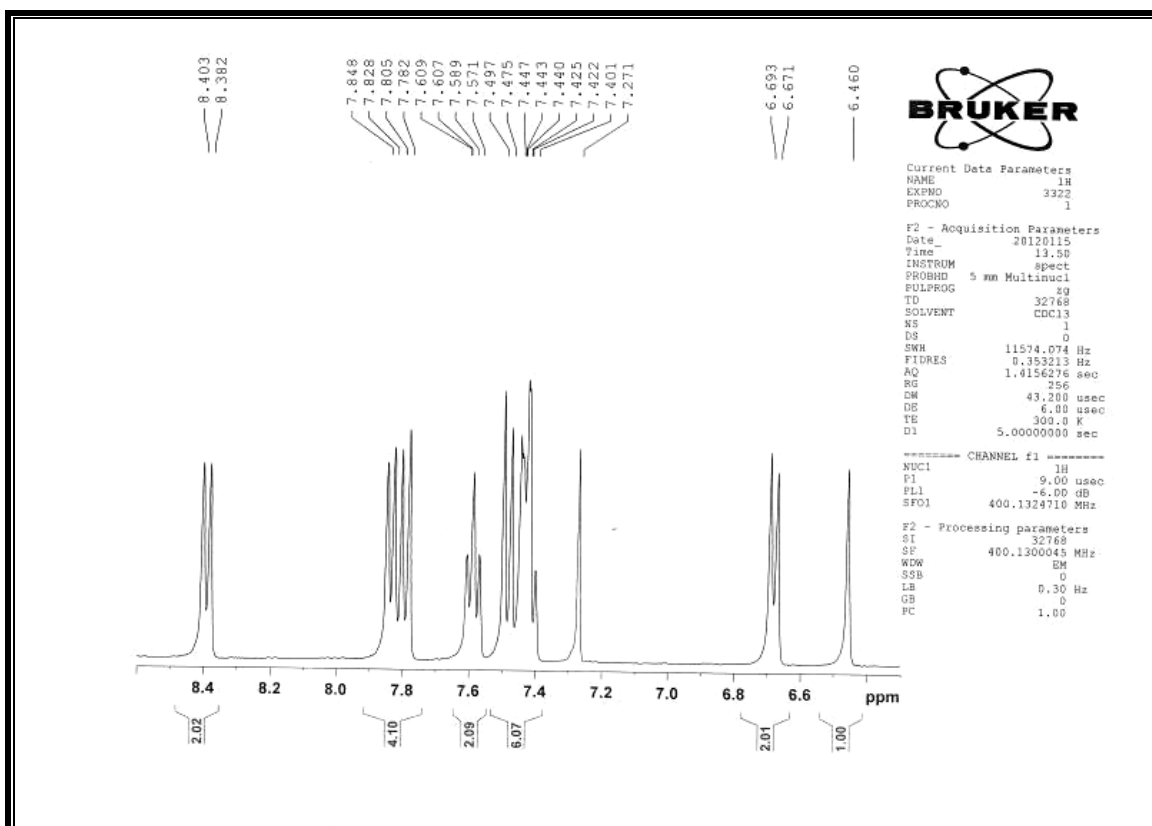

14-(3-methyl)14H-dibenzo[a,j]xanthene:

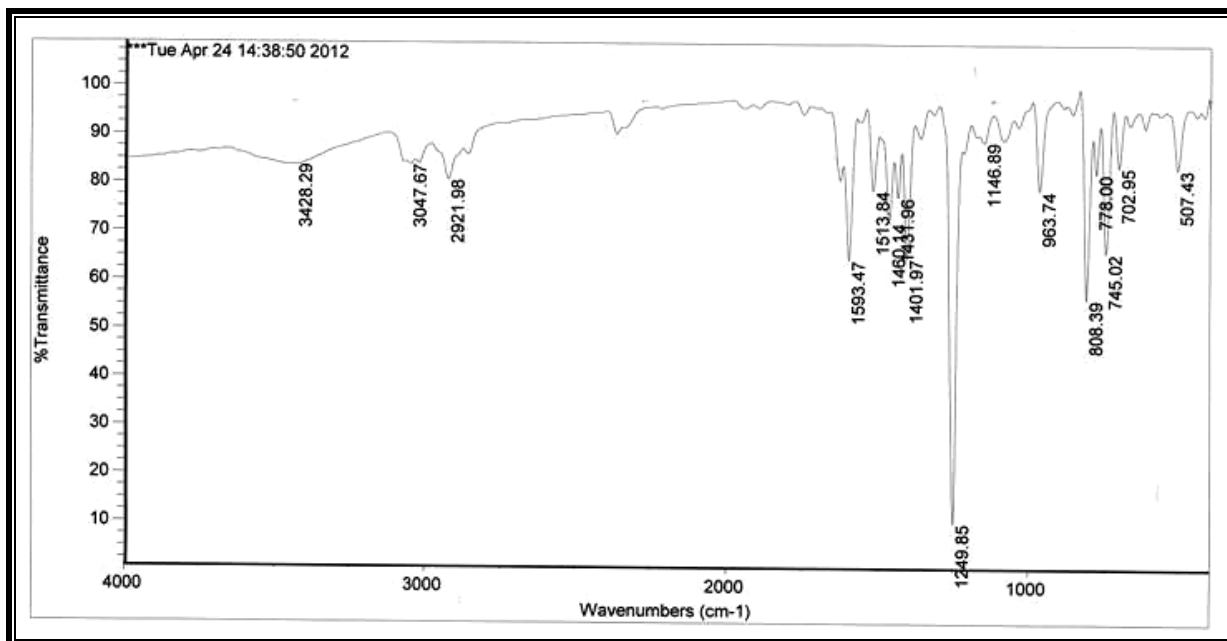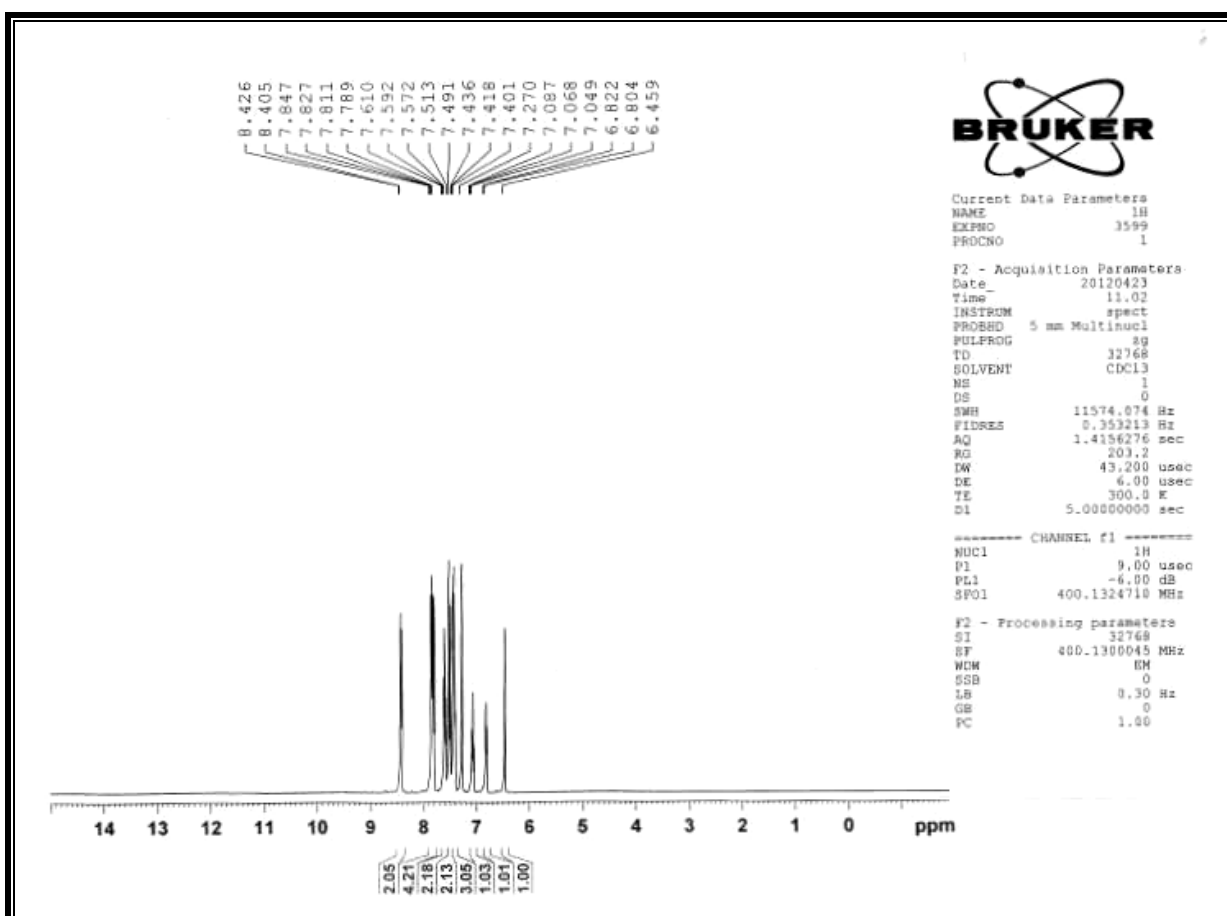

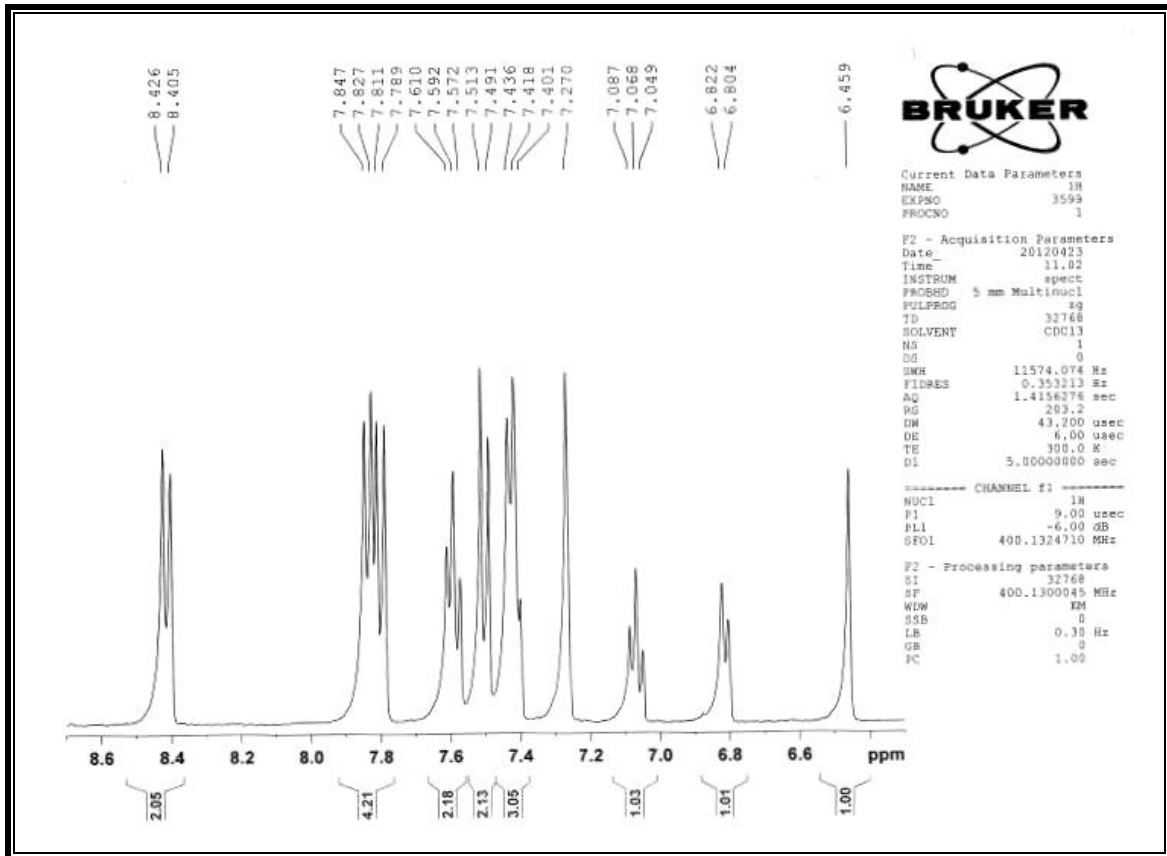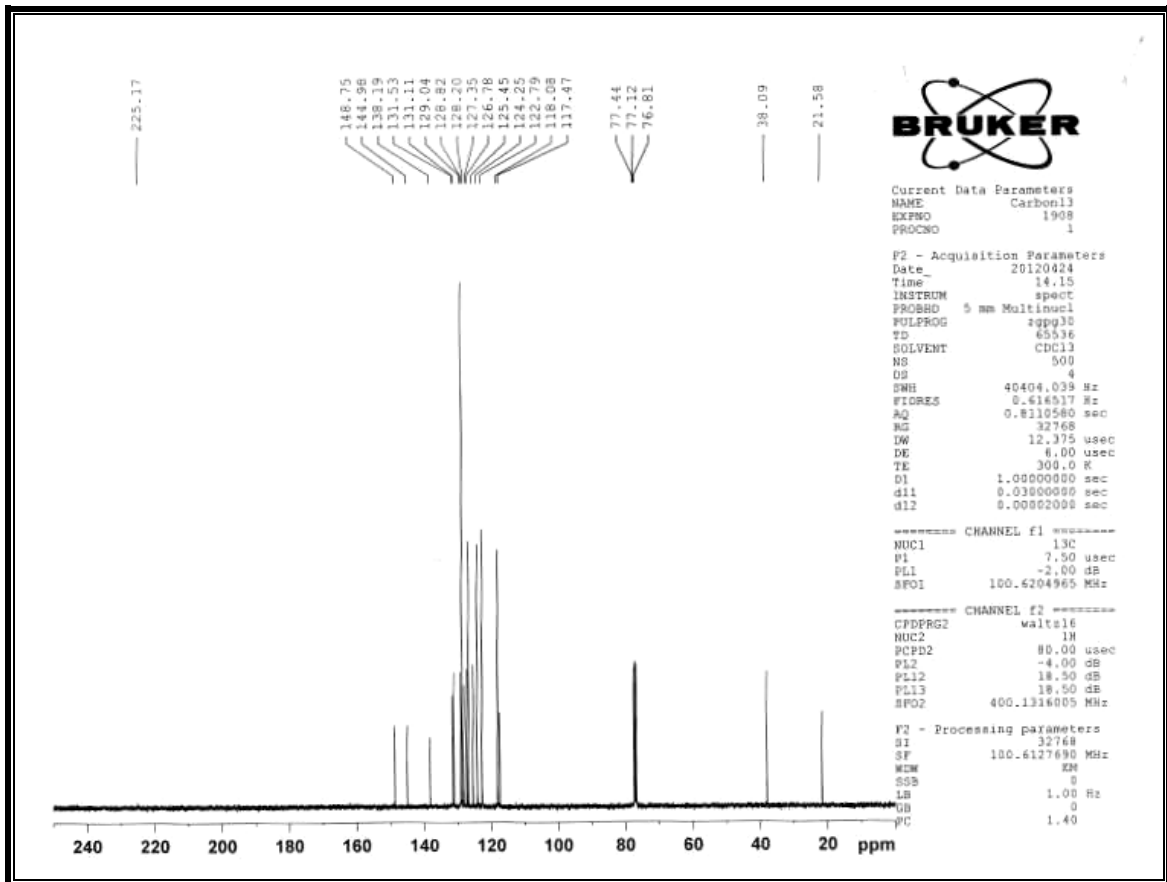

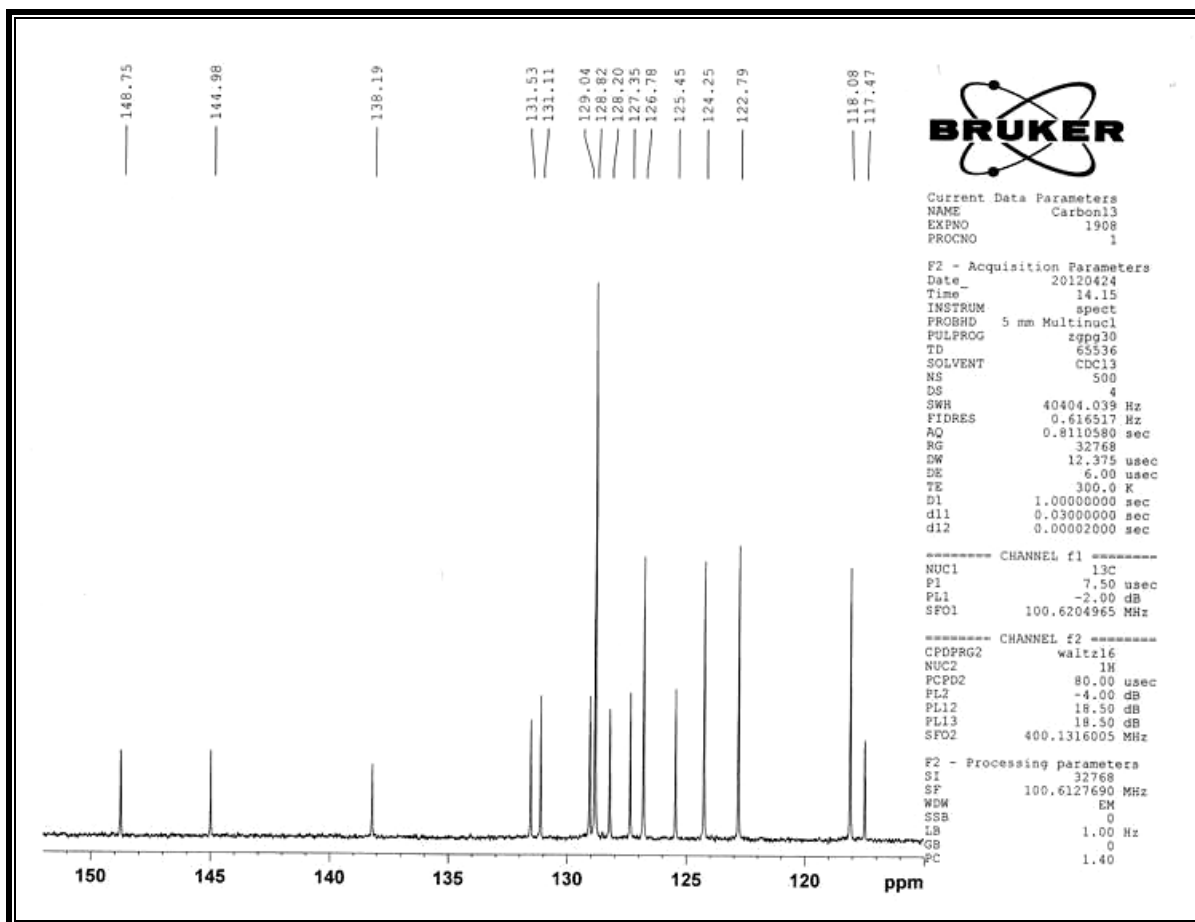

14-(4-methyl)14H-dibenzo[a,j]xanthene:

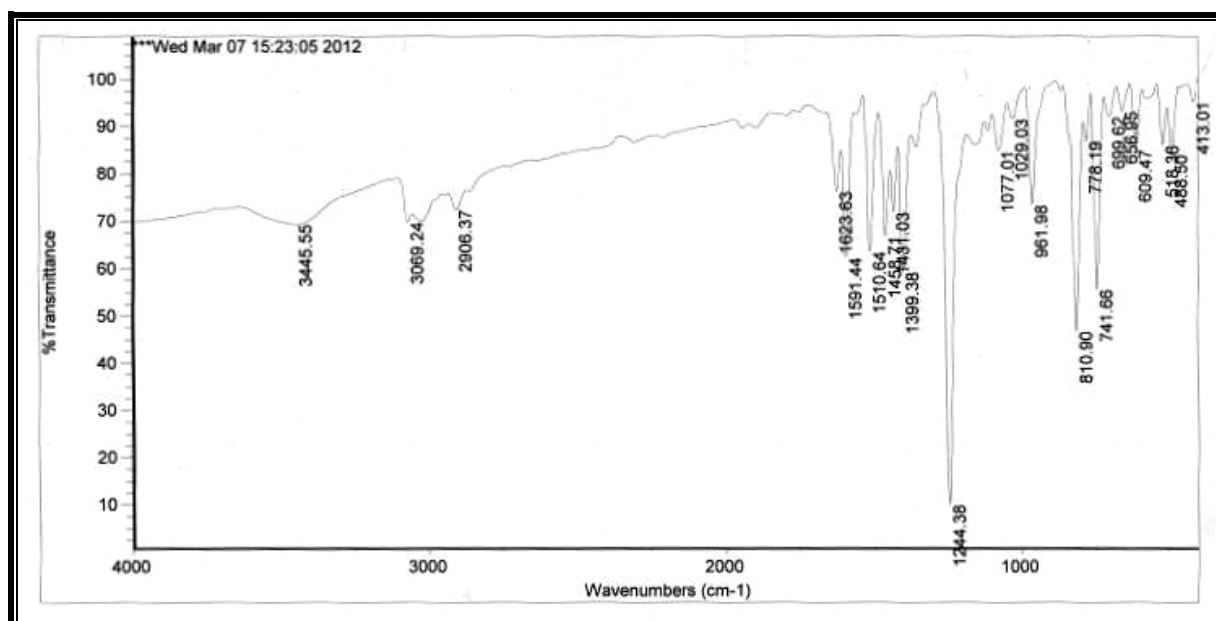

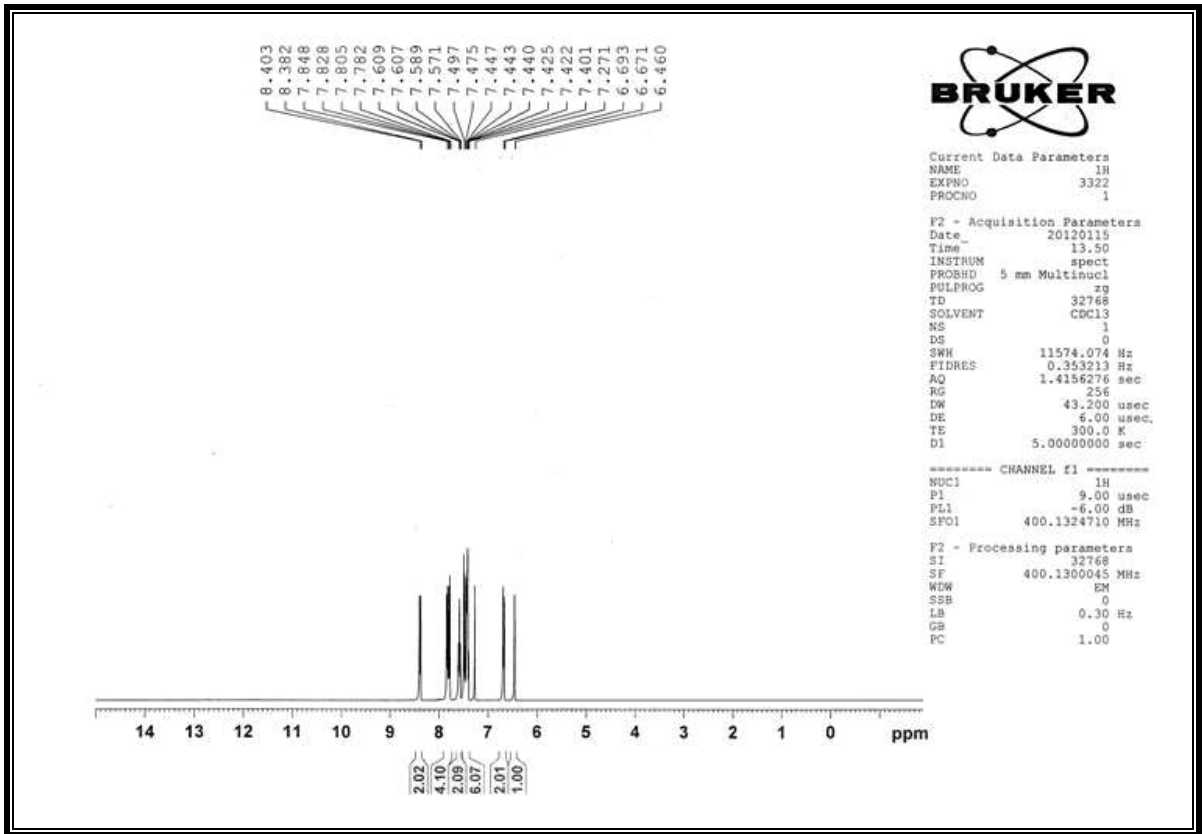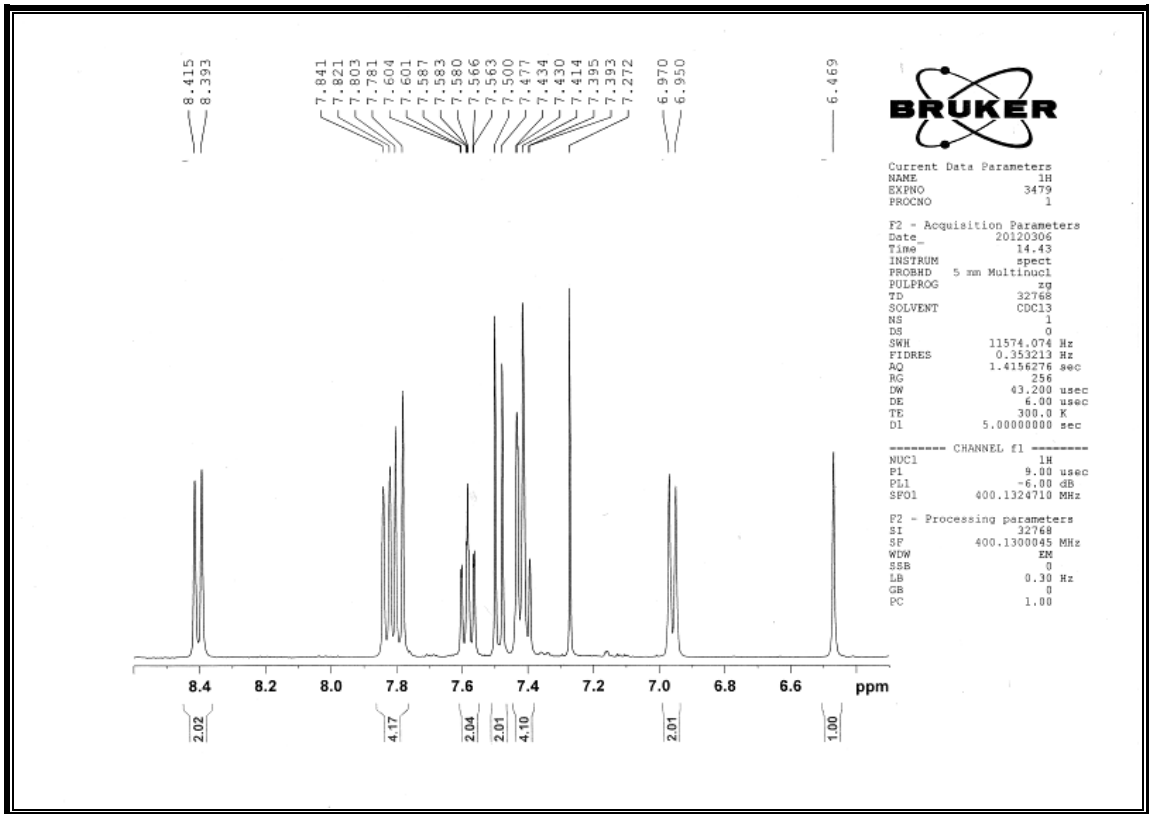

149.68  
142.14  
135.91  
131.46  
131.08  
129.10  
128.79  
128.77  
128.11  
126.77  
124.22  
122.72  
119.02  
117.46

77.29  
77.08  
76.76

37.64

20.91

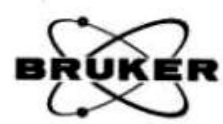

Current Data Parameters  
NAME Carbon13  
EXPNO 1846  
PROCNO 1

F2 - Acquisition Parameters  
Date\_ 20120307  
Time 14.59  
INSTRUM spect  
PROBHD 5 mm Multinuc1  
PULPROG zgpg30  
TD 65536  
SOLVENT CDCl3  
NS 500  
DS 4  
SWH 40404.035 Hz  
FIDRES 0.414517 Hz  
AQ 0.6110580 sec  
RG 32768  
DM 12.375 usec  
DE 6.00 usec  
TE 300.0 K  
SI 1.0000000 sec  
dS1 0.03000000 sec  
dS2 0.00002000 sec

----- CHANNEL f1 -----  
NUC1 13C  
P1 7.50 usec  
PL1 -2.00 dB  
SFO1 100.6204965 MHz

----- CHANNEL f2 -----  
CPDPRG2 waltz16  
NUC2 1H  
PCPD2 80.00 usec  
PL2 -4.00 dB  
PL12 18.50 dB  
PL13 18.50 dB  
SFO2 400.1316005 MHz

F2 - Processing parameters  
SI 32768  
SF 100.6127490 MHz  
SCW 8M  
SSB 0  
LB 1.00 Hz  
GB 0  
PC 1.40

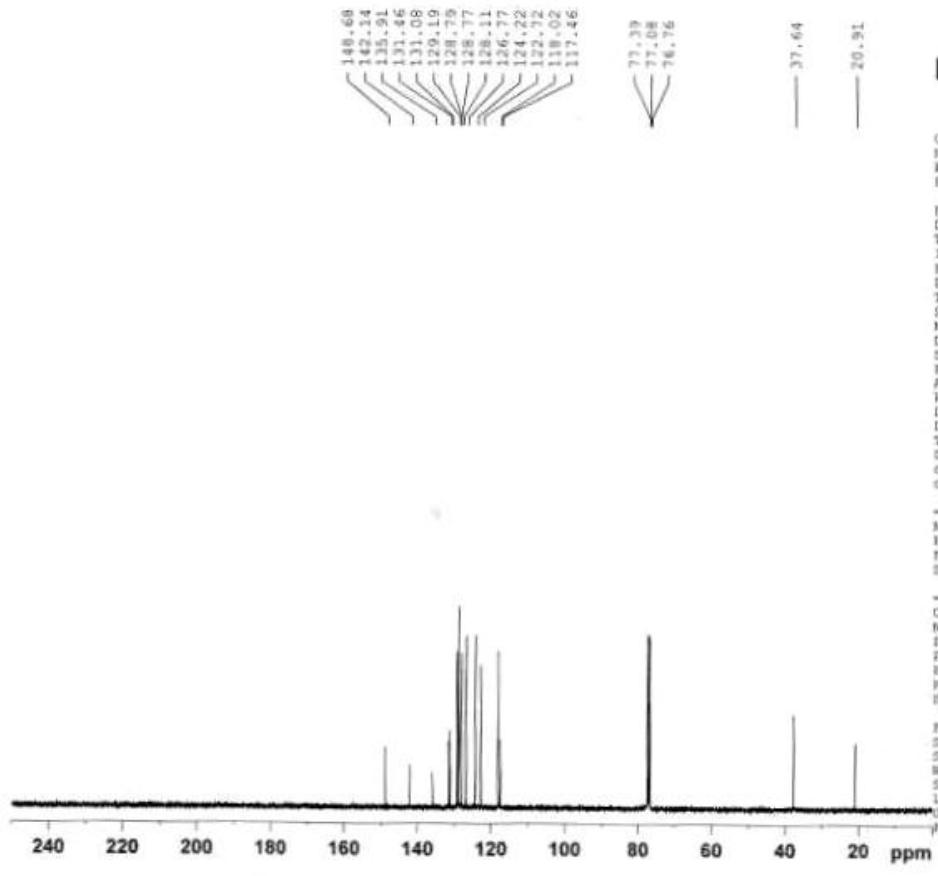

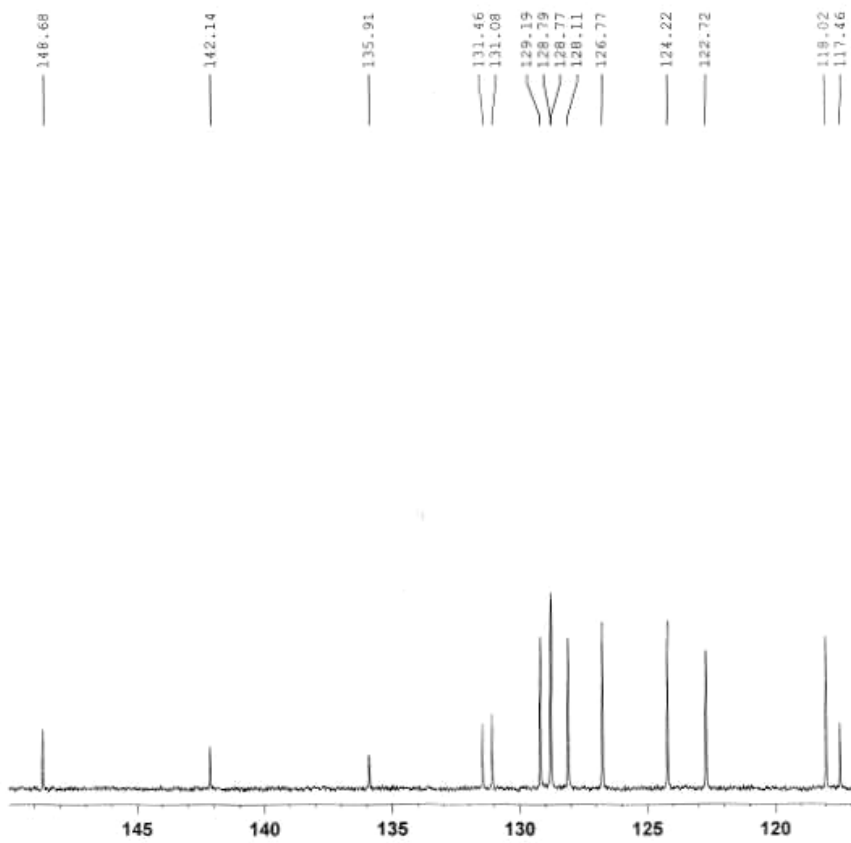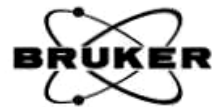

Current Data Parameters  
 NAME Carbon13  
 EXPNO 1866  
 PROCNO 1

F2 - Acquisition Parameters  
 Date 20120307  
 Time 14.59  
 INSTRUM spect  
 PROSD 5 mm Multiscl  
 PULPROG zgpg30  
 TD 65536  
 SOLVENT CDCl3  
 NS 500  
 DS 4  
 SWH 40404.039 Hz  
 FIDRES 0.416517 Hz  
 AQ 0.8110580 sec  
 RG 32768  
 DX 12.375 usec  
 DE 6.00 usec  
 TE 300.0 K  
 D1 1.00000000 sec  
 d11 0.03000000 sec  
 d12 0.00002000 sec

----- CHANNEL f1 -----  
 NUC1 13C  
 F1 7.50 usec  
 PL1 -2.00 dB  
 SFO1 100.6204965 MHz

----- CHANNEL f2 -----  
 CPDPRG2 waltz16  
 NUC2 1H  
 PCPD2 80.00 usec  
 PL2 -4.00 dB  
 PL12 18.50 dB  
 PL13 18.50 dB  
 SFO2 400.1316005 MHz

F2 - Processing parameters  
 SI 32768  
 SF 100.6127690 MHz  
 WCW EM  
 SSB 0  
 LB 1.00 Hz  
 GB 0  
 PC 1.40
